How tasks change whole-brain functional organization to reveal brain-phenotype relationships

Abigail S. Greene<sup>1</sup>, Siyuan Gao<sup>2</sup>, Stephanie Noble<sup>3</sup>, Dustin Scheinost<sup>3,4,5</sup>, R. Todd Constable<sup>1,3,6,7,\*</sup>

<sup>1</sup>Interdepartmental Neuroscience Program, Yale University

<sup>2</sup>Department of Biomedical Engineering, Yale School of Engineering & Applied Science

<sup>3</sup>Department of Radiology and Biomedical Imaging, Yale School of Medicine

<sup>4</sup>Department of Statistics and Data Science, Yale University

<sup>5</sup>The Child Study Center, Yale School of Medicine

<sup>6</sup>Department of Neurosurgery, Yale School of Medicine

<sup>7</sup>Lead contact

\*Correspondence: [todd.constable@yale.edu](mailto:todd.constable@yale.edu)

Corresponding Author: R. Todd Constable  
Yale University  
The Anlyan Center  
300 Cedar Street  
New Haven, CT 06520

E-mail: [todd.constable@yale.edu](mailto:todd.constable@yale.edu)

Figure and table count: 5 figures  
19 figure supplements

Keywords: Functional connectivity, brain-phenotype relationships,  
predictive modeling, fMRI, tasks

## Abstract

30 Functional connectivity (FC) calculated from task fMRI data better reveals brain-phenotype  
relationships than rest-based FC, but why is unknown. In over 700 individuals performing 7 tasks,  
32 we use psychophysiological interaction (PPI) and predictive modeling analyses to demonstrate  
that FC and overall degree of task-induced signal change, but not task-evoked activation alone,  
34 drive phenotypic prediction, and their combination further improves prediction. Inter-subject PPI  
demonstrates that predictive utility is highest in distributed FC patterns that are dissimilar across  
36 individuals, except in regions of group-level task activation, suggesting that task FC better  
predicts phenotype than rest FC for two, regionally specific reasons: (1) tasks synchronize  
38 activated regions and amplify signal components that meaningfully vary across individuals; and  
(2) elsewhere, prediction is driven by nodal interactions that set individuals apart. These findings  
40 offer a framework to leverage both task activation and FC to reveal the neural bases of complex  
human traits, symptoms, and behaviors.

42

## 44 **Introduction**

46 Functional connectivity analyses have offered sweeping insights into the macroscale  
neural circuits underlying complex cognitive processes, finding these circuits to be broadly  
distributed across the human brain (e.g., Dubois et al., 2018; Finn et al., 2015; Hsu et al., 2018;  
48 Rosenberg et al., 2015; Wager et al., 2013). Such analyses are typically performed using resting-  
state data (Biswal, Yetkin, Haughton, & Hyde, 1995; Power, Schlaggar, & Petersen, 2014),  
50 revealing “intrinsic connectivity networks” that recapitulate networks invoked during task  
execution (Stephen M Smith et al., 2009). This correspondence—along with demonstrations of  
52 the stability of functional connectivity (FC) patterns between resting and task states (Cole,  
Bassett, Power, Braver, & Petersen, 2014; Gratton et al., 2018; Krienen, Yeo, & Buckner, 2014)—  
54 suggests that the functional network architecture of the human brain is relatively state-invariant.  
Nevertheless, there is a growing consensus that FC contains useful dynamic, rather than just  
56 static, information (J. R. Cohen, 2018). Task-induced changes in patterns of FC have been shown  
to be widely distributed across the brain (Bolt, Nomi, Rubinov, & Uddin, 2017), to subserve the  
58 task at hand (Medaglia, Lynall, & Bassett, 2015), to make individuals more identifiable (Finn et  
al., 2017), and to improve FC-based prediction of both task performance (Rosenberg et al., 2015)  
60 and stable traits, such as intelligence measures (Greene, Gao, Scheinost, & Constable, 2018).  
Together, these findings suggest that task-induced changes in FC, while perhaps low-amplitude  
62 and/or local perturbations of a core functional architecture, are functionally significant and may  
amplify individual differences in brain functional organization.

64 Thoughtfully leveraging such changes therefore holds the promise of advancing  
individual differences research, but this will first require a more complete characterization of how  
66 tasks change patterns of FC. In particular, the question of whether these changes reflect task-  
evoked activation, changes in neural interaction, or some combination of the two has received  
68 substantial attention. While some have raised concerns that inadequate removal of task-evoked  
activation from node time courses may yield spurious patterns of FC (Cole et al., 2019), others  
70 have demonstrated that task-evoked activation and task-induced changes in FC can be cleanly  
dissociated (Di & Biswal, 2018), even when task-evoked activation is not removed from the BOLD  
72 signal (Kieliba et al., 2018), and that task-evoked FC (that is, task-induced changes in FC  
attributable to task-evoked activity) explains relatively little of the total task-induced change in  
74 FC (Lynch et al., 2018).

Here, we replicate and extend this growing literature, and in particular the work of Di and  
76 Biswal (Di & Biswal, 2018), by demonstrating that activation and FC calculated from in-scanner

task data (hereafter, “task FC”) are spatially distinct and, critically, offer complementary insights  
78 into the neural bases of a given phenotype. That is, while we have previously demonstrated that  
task FC-based models better predict phenotypic measures than rest FC-based models (Greene  
80 et al., 2018), whether this improvement is attributable to sharpening of connectivity patterns  
irrespective of task condition (hereafter task “context”), task-evoked activation, and/or context-  
82 dependent changes in nodal synchrony (Figure 1a) remains an open question. To explore this  
question, we use the connectome-based predictive modeling (CPM) framework (Finn et al., 2015;  
84 Gao, Greene, Constable, & Scheinost, 2019; Xilin Shen et al., 2017), psychophysiological  
interaction (PPI) analyses (Cole et al., 2013; McLaren, Ries, Xu, & Johnson, 2012), and a novel  
86 extension of PPI and inter-subject FC (Simony et al., 2016) analyses to demonstrate that, in a  
range of tasks, the most informative single signal component for fluid intelligence (gF) prediction  
88 varies by task, but task activation fails to predict gF in all tasks, and model performance is  
improved by the inclusion of multiple signal components. This is true even when no single  
90 component successfully predicts gF, suggesting that each component carries independent,  
trait-relevant information that together is greater than the sum of its parts. Finally, given the  
92 recent finding that tasks increase both the similarity (i.e., correlation) of individuals’ patterns of  
FC and the identifiability of individuals on the basis of these patterns (Finn et al., 2017), we  
94 investigated the relationship between consistency of BOLD signals across individuals and their  
predictive utility. Across the brain, inter-subject consistency of moment-to-moment BOLD  
96 fluctuations decreases the predictive utility of incident edges, with one exception: for edges that  
connect focal, activated regions, inter-subject consistency boosts predictive utility. This finding  
98 highlights that while changes in FC, not task activation, reveal brain-phenotype relationships,  
informative task-induced changes in FC take two forms: distributed and individual-specific, and  
100 focal and stereotyped.

## 102 **Results**

*During a task, FC and overall degree of task-induced signal change—but not task-evoked  
104 activation—predict phenotype*

To explore why task FC-based models outperform resting-state FC-based models, we  
106 used data from the Human Connectome Project (HCP; Van Essen et al., 2013) S1200 release ( $n$   
= 703; see Methods for inclusion criteria). Each subject completed seven in-scanner tasks,  
108 providing an internal validation of results’ generalizability; for each task run, fMRI data were  
parcellated into 268 nodes (Finn et al., 2015; X. Shen, Tokoglu, Papademetris, & Constable,

110 2013) and a mean time course was calculated for each node. Each node’s time course was  
 decomposed via multilinear regression, using a validated psychophysiological interaction (PPI)  
 112 framework (Cole et al., 2013; McLaren et al., 2012), into terms that reflect its context-  
 independent FC with the predictor node (ciFC), its context-dependent FC with the predictor node  
 114 (cdFC), its task activation, and its overall degree of task-induced signal change (i.e., intercept,  
 which effectively combines the task activation and interaction terms, as well as potentially  
 116 relevant, unmodeled information; for further discussion, see Figure 2—figure supplement 1).  
 Note that a non-zero, informative intercept term was made possible by the choice to zero-center  
 118 (i.e., set condition-on to 0.5, condition-off to -0.5), not mean-center (i.e., z-score), task-timing  
 regressors. The analysis was repeated with mean-centered task regressors, with comparable  
 120 results (Figure 2—figure supplement 1). For an explanation of why this choice does not affect  
 results of this analysis, as well as more details on the relevant methods, see *Methods*,  
 122 *Investigating potential confounds* and Figure 2—figure supplement 1. This regression was  
 performed for every node pair for each task and subject, and linear contrasts were calculated for  
 124 task activation and cdFC terms, yielding four PPI beta matrices per subject per task (Figure 1b).

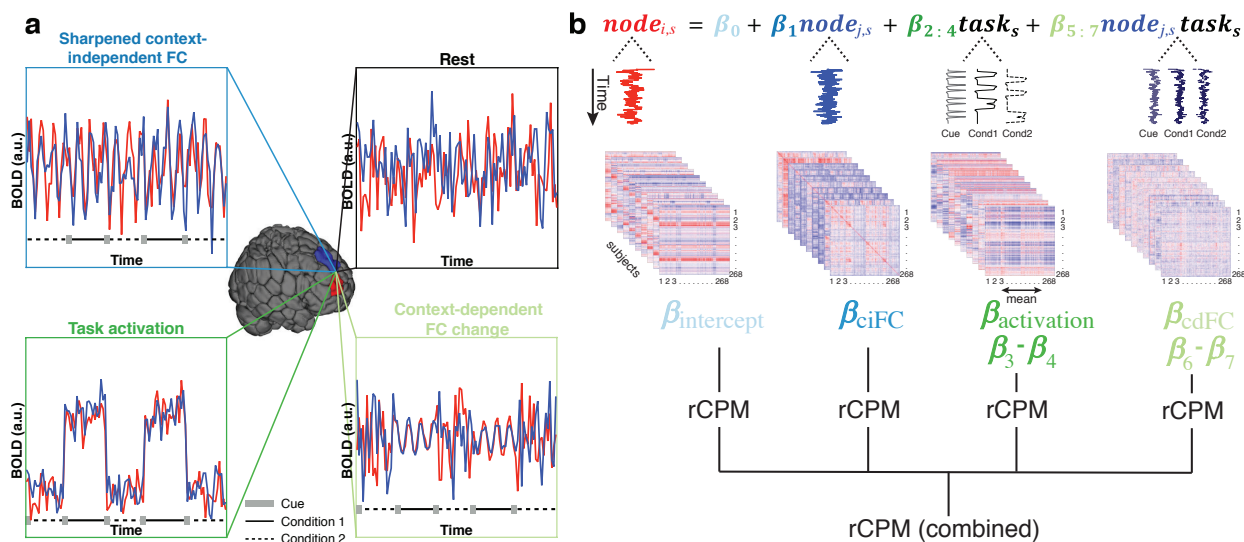

126 **Figure 1 with 2 supplements. Pairing psychophysiological interaction (PPI) analysis with**  
 128 **prediction permits characterization of how tasks change patterns of brain activity to reveal**  
 130 **brain-phenotype relationships.** (a) Relative to rest, in-scanner tasks may sharpen context-  
 independent FC (“ciFC”), elicit baseline shifts in activity (“task activation”), and/or induce  
 132 context-dependent changes in nodal synchrony (“cdFC”). (b) These components of each node’s  
 time course (here, examples taken from nodes in the WM task; see Methods) can be modeled in  
 an adapted gPPI framework, yielding one node-by-node matrix of PPI betas for each term in  
 each subject *s*. After calculating condition contrasts for the task activation and cdFC terms  
 134 (indicated schematically by subtracted betas) and collapsing task activation via averaging into a  
 single value per node per subject, these matrices (and vector, in the case of activation) were then

136 submitted, individually and in combination, to the ridge CPM pipeline (rCPM; Gao et al., 2019)  
138 to yield predictions of fluid intelligence (gF). See Methods for details. Cond, condition;  $i, j$ , two  
nodes in the Shen parcellation (Finn et al., 2015; X. Shen et al., 2013).

140 These matrices were then submitted, individually (“individual-term model”) and in  
combination (“combined model”), to a ridge regression-based version of the connectome-based  
142 predictive modeling pipeline (rCPM; Gao et al., 2019; Shen et al., 2017) to predict phenotype  
(here, gF) scores (Figure 1b). In brief, this cross-validated machine learning approach selects  
144 features on the basis of their correlation with the predicted measure, regresses (with ridge  
regularization) phenotype scores on selected features’ values (here, PPI beta estimates), and  
146 uses resulting ridge regression coefficient estimates to construct a linear model relating brain  
data to phenotype measures. This model is then applied to the left-out fold, and the process is  
148 repeated iteratively until all folds have been used as the test group (see Methods for details).  
Model performance was quantified as  $1 - \text{normalized mean squared error}$  (Methods) of each  
150 model ( $q^2$ ; higher values indicate better performance). This analysis was repeated 100 times with  
different assignments of participants to folds, and performance is presented for every iteration  
152 (Figure 2a) and as the mean and standard deviation across iterations (Figure 2b).

Model performance was assessed for significance using non-parametric permutation  
154 tests. That is, the analysis was repeated 100 times with gF permuted across subjects each time;  
given the existence of many sibships in the dataset, allowed permutations respected family-  
156 related limits on exchangeability (Winkler, Ridgway, Webster, Smith, & Nichols, 2014; Winkler,  
Webster, Vidaurre, Nichols, & Smith, 2015).  $P$  values were calculated as the fraction of iterations  
158 on which the unpermuted gF-based models performed worse than the best-performing  
corresponding null model. For each task, the best-performing (i.e., highest mean  $q^2$ ) unpermuted  
160 gF-based model was also compared to the second best-performing model via Wilcoxon signed-  
rank test. All  $P$  values were corrected for multiple comparisons using the Bonferroni correction.

162 Consistent with previous work demonstrating that HCP task-based models successfully  
predict gF (Greene et al., 2018), for each task, at least one model significantly predicted gF (all  
164  $P < 0.001$ , corrected). Predictions were most accurate with the combined model for the language  
task (mean  $q^2 = 0.12$ ). Notably, which individual term best predicted gF was task-dependent. For  
166 some tasks, the intercept best predicted gF (gambling: intercept mean  $q^2 = 0.05$ ,  $P < 0.001$ ,  
corrected; WM: intercept mean  $q^2 = 0.02$ ,  $P < 0.001$ , corrected; social: intercept mean  $q^2 = 0.03$ ,  
168  $P < 0.001$ , corrected). For other tasks, ciFC best predicted gF (motor: ciFC mean  $q^2 = 0.03$ ,  $P <$   
 $0.001$ , corrected; emotion: ciFC mean  $q^2 = 0.03$ ,  $P < 0.001$ , corrected). In the language task,

170 intercept and cdFC predicted gF about equally well (intercept mean  $q^2 = 0.05$ , cdFC mean  $q^2 =$   
172 0.06, both  $P < 0.001$ , corrected). Finally, for the relational task, none of the individual-term  
174 models successfully predicted gF (all  $P > 0.05$ , corrected). Notably, task activation did not predict  
176 gF for any of the tasks; this result was replicated using HCP-released, individual-level GLM-  
178 based node activation for prediction (see *Methods, Investigating potential confounds* and Figure  
180 2—figure supplement 2). We note that model performance is lower than previously reported  
182 (Greene et al., 2018), a finding that holds when “standard FC” matrices (i.e., without task  
184 modeling) were passed through the same preprocessing and prediction pipelines (gray bars in  
186 Figure 2b, Figure 2—figure supplement 3); in fact, the best-performing PPI-based models often  
188 outperformed the standard FC-based models. However, the addition of global signal regression  
190 (GSR) to the FC matrix preprocessing pipeline substantially improved prediction performance,  
192 rendering it comparable to previous results (Figure 2—figure supplement 3). While GSR was not  
194 appropriate for main analyses due to potential task-related fluctuations of the global signal (e.g.,  
due to fluctuating arousal or vigilance [Liu et al., 2017]), and while these analyses depend on  
relative, rather than absolute, prediction performance, this finding supports the utility of GSR for  
FC-based prediction (Greene et al., 2018; Li et al., 2019).

186 However, for all tasks except emotion, combining all terms (intercept, ciFC, cdFC, and  
188 task activation) yielded a model that significantly outperformed the best-performing individual-  
190 term model for that task (all  $P < 0.001$ , corrected; Figure 2a,b). That the combined model was  
192 not most predictive for the emotion task may be related to the fact that the best-performing  
194 model for that task (ciFC alone) attained relatively low accuracy. The relatively high performance  
of combined models, but critically not cdFC- and activation-based models, persisted even when  
task regressors were mismatched with brain data (Figure 2—figure supplement 4; Methods), an  
analysis in which the combined model, and to a lesser degree ciFC (Figure 2—figure supplement  
2), would be expected to largely recapitulate standard FC.

196 Strikingly, these results suggest that the combined models are greater than the sum of  
198 their parts. That is, even for tasks where only one individual-term model significantly predicted  
gF, a successful combined model still significantly outperformed that individual-term model, and  
even significantly predicted gF when no individual-term models did (relational task: combined  
200 model mean  $q^2 = 0.07$ ,  $P < 0.001$ , corrected). Further, examining the relative contributions of  
202 each term to the combined model for all tasks (Figure 2c; see Methods for derivation)  
demonstrates that these contributions often do not follow the performance of individual-term  
models for that task, highlighting the importance of information uniqueness. For example, for the

language task, the intercept- and cdFC-based models are the only individual-term models that significantly predicted gF, but in the combined model, ciFC contributed the most predictive information, followed by cdFC and then intercept terms. This finding also holds in reverse; that is, term contribution makes only a slight difference in the performance of the model when that term is dropped (Figure 2—figure supplement 5). Notably, the predictive contributions of task activation to the combined models are negligible for all tasks.

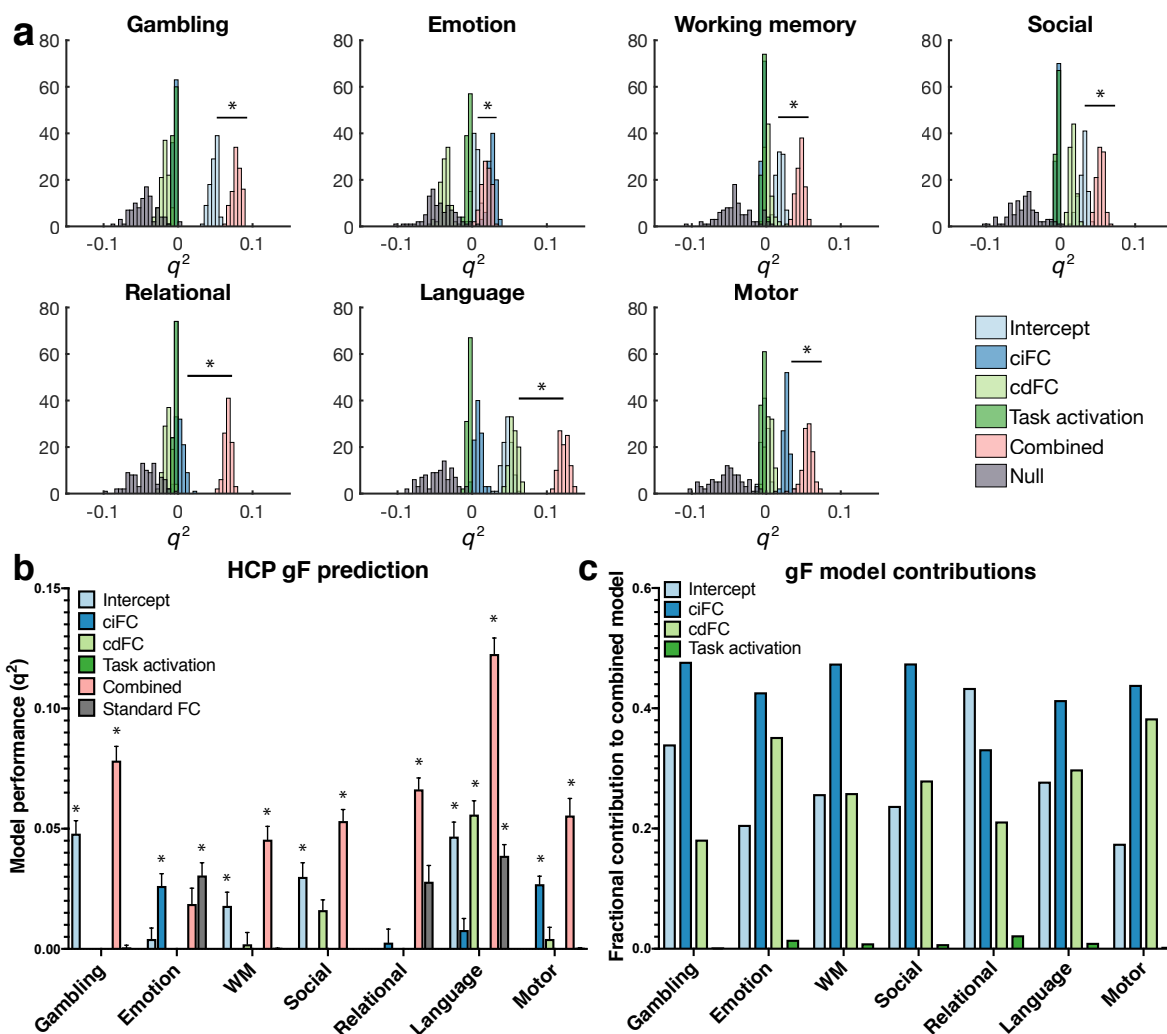

210 **Figure 2 with 10 supplements. Context-independent FC, context-dependent FC, and**  
 212 **overall task effect contain complementary information about phenotypic measures.** (a)  
 214 Histograms of model performance (quantified as  $q^2$  [see Methods]) across 100 iterations of 10-  
 216 fold rCPM with a  $P$  threshold of 0.1 for feature selection. In every task, the best-performing model  
 218 significantly outperformed the second-best-performing model ( $*P < 0.001$ , corrected, via  
 Wilcoxon signed rank test). “Null”: prediction performance using permuted gF scores. (b)  
 Summary (mean and s.d., indicated by error bars) of model performance for each task and term  
 ( $*P < 0.001$ , corrected, via permutation test). Models with negative mean  $q^2$  were set to 0.  
 “Standard FC”: prediction performance using FC calculated as Fisher-transformed Pearson



220 correlations, without task modeling (see Methods). (c) Percent contribution of each term to that task's combined model (see Methods for derivation). WM, working memory.

222 Further, given that mean motion was significantly correlated with observed gF for 3/7  
tasks (Figure 2—figure supplement 6) and with mean predicted gF for 6/35 tasks and terms  
224 (Figure 2—figure supplement 7), several additional analyses were performed to ensure that in-  
scanner motion did not confound results. First, rCPM was repeated using partial correlation with  
226 individuals' mean motion per condition—rather than simple correlation—for feature selection  
(i.e., selecting features that are correlated with gF after controlling for their correlation with  
228 motion). Second, even more conservatively, rCPM was repeated after regressing individuals'  
mean motion for the given task from both gF and each edge (within the cross-validation loop);  
230 models were built from resulting residuals (see *Methods, Investigating potential confounds*).  
Results are comparable, both in terms of mean model performance ( $r(\text{original, partial correlation})$   
232  $= 0.99$ ,  $r(\text{original, residualized}) = 0.99$ , all  $P < 0.001$ ; Figure 2—figure supplement 8) and feature  
weights (Figure 2—figure supplement 9), suggesting that modeling results are not confounded  
234 by in-scanner motion. Frame-to-frame motion was also found to be uncorrelated with task timing  
(Figure 2—figure supplement 10).

236

#### *Model contributions of FC and activation terms are spatially distributed and distinct*

238 We next sought to characterize the spatial distribution of features with high predictive  
utility (i.e., model contribution) for each term in each task's combined model. Predictive utility  
240 was quantified as the mean ridge coefficient across 100 iterations for features selected in 75%  
of analyses (10 folds \* 100 iterations), scaled by the standard deviation of the PPI betas for that  
242 feature across all subjects. Except where otherwise noted, signed contributions were used to  
dissociate features that are positively and negatively related to gF. The seven tasks  
244 demonstrated substantial consistency in overall spatial patterns of predictive utility; for concision  
and clarity, the motor task is used to exemplify these patterns, with corresponding results for all  
246 tasks displayed in Figure 3—figure supplement 1.

We first summarized the distribution of predictive features at the node level, calculating  
248 the percent contribution of each node as the summed, absolute predictive utility of all edges  
incident to it (or, in the case of activation, as the absolute predictive utility of the node),  
250 normalized by the sum of all nodes' absolute predictive utility for the given task and term. Results  
(Figure 3a, d, g) demonstrate that predictive ciFC and cdFC features are broadly distributed

252 across the brain, while activation information content is sparser and concentrated more focally  
(for the motor task, primarily in visual and motor regions).

254 Next, we explored the distribution of predictive features at the network level, using ten  
canonical networks defined in an independent sample (Finn et al., 2015; Noble et al., 2017; for  
256 details, see Methods: *Functional parcellation and network definition* and Figure 3—figure  
supplement 2). For each network pair, ciFC and cdFC features' contributions were summed and  
258 normalized by the total number of features between that network pair. These values were  
normalized by the total, absolute sum of contributions for the given task and term, to yield a  
260 comparable scale across tasks. For task activation, features' (i.e., nodes') contributions were  
summed for each network, normalized by the size of (i.e., number of nodes in) the given network,  
262 and then all values were normalized by the absolute sum of these contributions for the given  
task. Resulting matrices and vectors are visualized in Figure 3b (ciFC), 3e (cdFC), and 3h  
264 (activation) with the difference between absolute ciFC (Figure 3b) and absolute cdFC (Figure 3e)  
network contributions visualized in Figure 3i. Results across tasks demonstrate the substantial  
266 and distributed contributions of ciFC and cdFC features to the combined models (c.f., Figure 3—  
figure supplement 1a, c, f), which contrasts with the more focal distribution of nodes with  
268 predictive activation (Figure 3g, h, and Figure 3—figure supplement 1e). Critically, predictive  
features are relatively non-overlapping for ciFC and cdFC (paired, two-sided Wilcoxon signed  
270 rank test of ciFC versus cdFC concatenated, vectorized, network matrices:  $P < 0.001$ ; mean rank  
correlation between vectorized, absolute model contributions for ciFC versus cdFC across all  
272 tasks: overall  $\bar{r}_s = 0.01$ , intersection of predictive ciFC and cdFC features only  $\bar{r}_s = 0.10$ ). In  
particular, visual inspection of these matrices reveals that, across tasks, predictive ciFC edges  
274 tend to be concentrated in medial frontal and frontoparietal networks, while predictive cdFC  
edges tend to be concentrated in motor and visual networks.

276 It is important to note that the predictive utility and distribution of useful context-  
dependent features will necessarily depend on the condition contrast that is applied, and these  
278 results demonstrate how findings can be interpreted with some cognitive specificity, given this  
choice. For example, while motor task ciFC and cdFC demonstrate similar overall patterns of  
280 predictive utility as other tasks (i.e., relative overrepresentation of edges in medial frontal and  
frontoparietal networks for ciFC, and in visual networks for cdFC), the motor task contrast—all  
282 motions (tongue, hands, and feet) versus fixation—reveals consistently negative cdFC ridge  
coefficients. That is, across the brain, the lower the FC during these body motions, the higher an  
284 individual's gF (Figure 3e). This pattern is in stark contrast to other tasks' patterns of cdFC

286 predictive contributions (Figure 3—figure supplement 1c), a finding with potentially interesting  
cognitive implications (see Discussion).

288 Before calculating the predictive contributions of network pairs (or networks, in the case  
of activation), ciFC and cdFC features were divided into edges with mean positive and mean  
negative ciFC (and activation features into nodes with mean positive and negative activation).  
290 This avoids a potential ambiguity: one could imagine a positive edge that is more positive (i.e.,  
stronger) in individuals with higher gF, or a negative edge that is less negative (i.e., weaker) in  
292 individuals with higher gF. Both edges would receive a positive ridge coefficient but may  
represent physiologically distinct processes. Interestingly, we found that the ciFC and cdFC of  
294 edges with mean negative ciFC made essentially no contributions to combined models for any  
of the tasks (Figure 3—figure supplement 3a-b), and main results reflect only edges with mean  
296 positive ciFC (Figure 3b, e, i). Network-level contributions of cdFC patterns were further divided  
by mean cdFC (i.e., edges with positive mean cdFC and edges with negative mean cdFC); results  
298 are visualized in Figure 3—figure supplement 4. Conversely, both activated and deactivated  
nodes were consistently included in predictive models; given this, task activation network-level  
300 predictive utility is presented for both activated and deactivated nodes (Figure 3h; Figure 3—  
figure supplement 1e).

302 Visualizing predictive contributions at the network level, while useful, offers a necessarily  
coarse representation of where in the brain highly predictive features are located. To visualize  
304 the predictive utility of individual features, we present circle plots, with each network a different  
color on the outer track, and each line a ciFC (Figure 3c, Figure 3—figure supplement 1b) or  
306 cdFC (Figure 3f, Figure 3—figure supplement 1d) edge. This visualization again highlights that  
model contributions are distributed and relatively non-overlapping across terms. Specifically, it  
308 reveals that highly predictive cdFC features are not incident to the most predictive or most  
activated nodes (Figure 3f, Figure 3—figure supplement 1d): mean rank correlation of cdFC  
310 absolute contribution-based node degree (Methods) with absolute model contribution of each  
node's activation:  $\bar{r}_s = 0.004$ ; mean rank correlation of cdFC node degree with absolute task  
312 effect size:  $\bar{r}_s = 0.06$ . Similarly, the contribution of a node's activation is only weakly related to its  
absolute task effect size:  $\bar{r}_s = 0.11$ . In sum, these results demonstrate that predictive utility—of  
314 ciFC, cdFC, or even task activation, itself—is not simply driven by task activation, and that  
predictive features from each of these terms are spatially highly distributed and relatively non-  
316 overlapping across terms.

Finally, it is worth noting that different insights can be gained from interpreting predictive contributions at the node, network, and edge levels (Horien, Greene, Constable, & Scheinost, 2019), as shown in Figure 3. The maximum correlation between vectorized, absolute model contributions of ciFC and cdFC is for the motor task (overall  $r_s = 0.07$ , intersection of predictive ciFC and cdFC features only  $r_s = 0.27$ ). Interestingly, the network visualizations (Figure 3b and 3e) obscure this similarity, which is more evident when feature contributions are visualized at the edge level (Figure 3c and 3f), demonstrating the differential utility of fine- and coarse-scale spatial localization analyses.

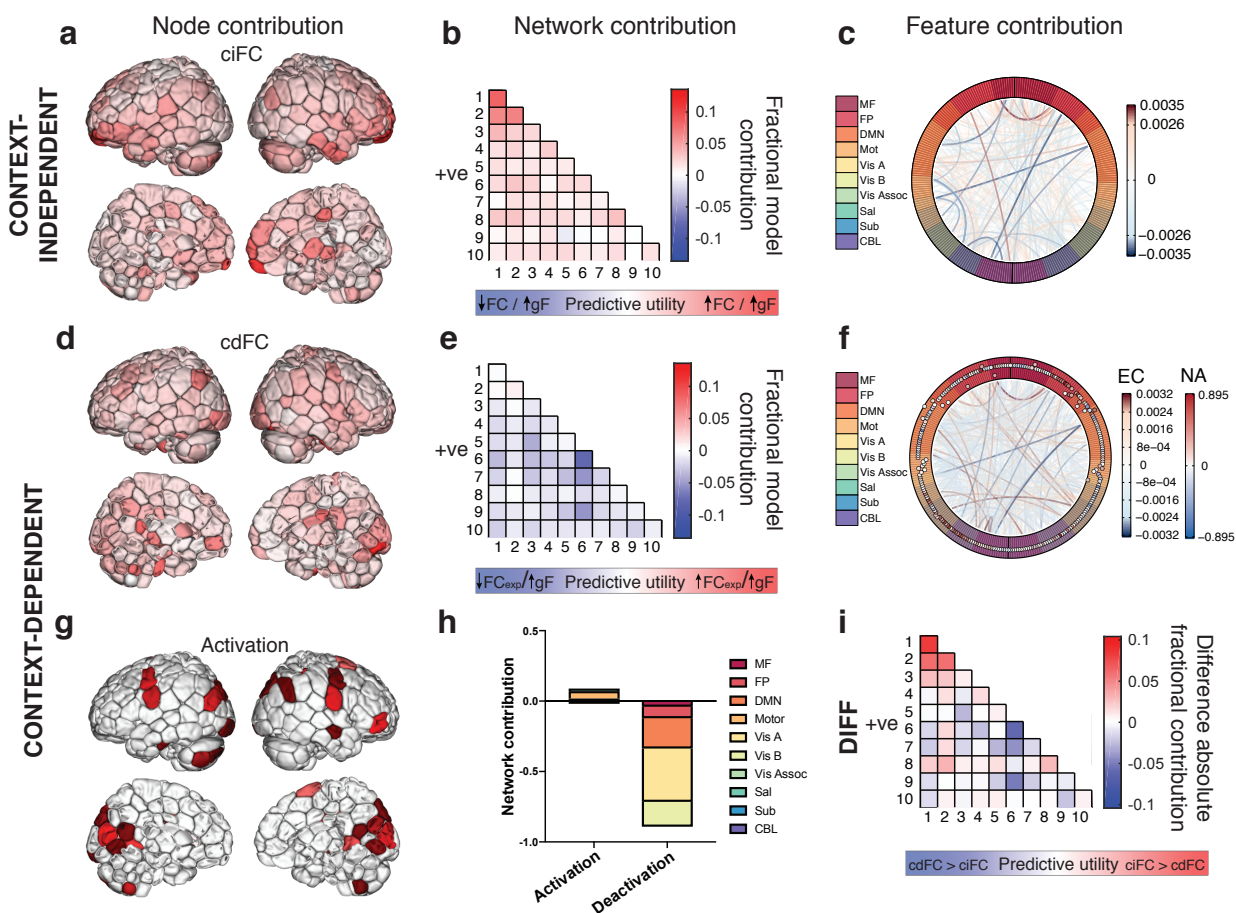

**Figure 3 with 4 supplements. Context-independent FC, context-dependent FC, and activation predictive features are distributed and distinct.** (a) Visualization of predictive ciFC features by node (i.e., absolute weighted node degree, normalized within task/term [see Methods], such that darker red indicates greater predictive utility). In this and all subsequent panels, results are depicted for the motor task; comparable results in all tasks can be found in Figure 3—figure supplement 1. (b) Visualization of predictive ciFC features by network for each task. Red = positive ridge coefficients, blue = negative ridge coefficients, shade = relative model contribution. In this and all subsequent figures: “+ve” indicates that results reflect only

334 contributions of edges with mean positive ciFC. 1-10 = network assignment. (c) Visualization of  
individual predictive ciFC features, with each consistently selected edge represented as a line;  
336 line color and thickness scale with predictive model contribution. In this and all subsequent  
figures, MF = medial frontal, FP = frontoparietal, DMN = default mode network, Mot = motor, Vis  
338 A = visual A, Vis B = visual B, Vis Assoc = visual association, Sal = salience, Sub = subcortical,  
CBL = cerebellum. (d) Visualization of predictive cdFC features by node (as in [a]). (e) Visualization  
340 of predictive cdFC features by network.  $FC_{exp}$ , FC during the experimental condition (i.e.,  
condition of interest). Red = positive ridge coefficients, blue = negative ridge coefficients, shade  
342 = relative model contribution. 1-10 = network assignment. (f) Visualization of individual predictive  
cdFC (lines) and activation (outer track circles) features; line color and thickness scale with cdFC  
344 feature predictive utility, and circles represent the corresponding nodes, with their color  
indicating mean activation (red = positive, blue = negative) and distance from the x axis indicating  
346 their model contribution. EC, edge contribution; NA, node activation. (g) Visualization of  
predictive activation features (i.e., absolute node predictive utility, normalized within task/term,  
348 as in [a,d]). (h) Visualization of predictive activation features' (i.e., nodes') network assignments  
for nodes with mean positive PPI activation betas ("activation") and for nodes with mean negative  
350 PPI activation betas ("deactivation"). (i) Visualization of the difference between absolute,  
network-level ciFC model contributions (i.e., absolute value of matrix in [b]) and absolute,  
352 network-level cdFC model contributions (i.e., absolute value of matrix in [e]).

354 *Context-independent FC is more consistent across individuals than context-dependent FC or  
activation*

356 To explore the consistency of task effects on FC and activation across individuals, and  
the potential relationship between this consistency and predictive utility, we performed an inter-  
358 subject PPI analysis (Figure 4a) on the five tasks with consistent task timing across individuals  
(emotion, gambling, social, relational, and WM). This analysis revealed substantial consistency  
360 in activity patterns across individuals.

The network-level spatial distribution of inter-subject consistency is visualized for positive  
362 (and self-connecting; see Methods) edges' context-independent (Figure 4b) and context-  
dependent (Figure 4c) signals. As was the case for the prediction analyses, effects were almost  
364 entirely limited to edges with positive mean ciFC (i.e., positive mean PPI betas for the ciFC term,  
as were used previously); inter-subject consistency of mean negative edges' ciFC are presented  
366 in Figure 4—figure supplement 1c, and of mean negative edges' cdFC in Figure 4—figure  
supplement 1d. These visualizations reveal two trends. First, during a task, positive edges' ciFC  
368 and nodes' time courses become more similar across individuals (relative to intrinsic  
components of the BOLD signal, e.g., at rest, which should be uncorrelated across subjects  
370 [Simony et al., 2016]) in almost all networks for all tasks (Figure 4b), while context-dependent  
effects vary more by task and network, as would be expected given the varying designs and  
372 demands of the tasks (e.g., some network pairs' edges are consistently stronger during the

experimental condition relative to the control condition [red], while others are consistently weaker during the experimental condition relative to the control condition [blue]; Figure 4c). Second, ciFC inter-subject consistency is overall greater than cdFC or task activation inter-subject consistency (Figure 4d; median ciFC consistency: mean across tasks = 0.396, range = 0.27-0.63; median cdFC consistency: mean across tasks = -0.01, range = -0.04-0.01; median activation consistency: mean across tasks = -0.004, range = -0.03-0.01), suggesting that moment-to-moment fluctuations are more similar across individuals than are block-level changes in FC and activation.

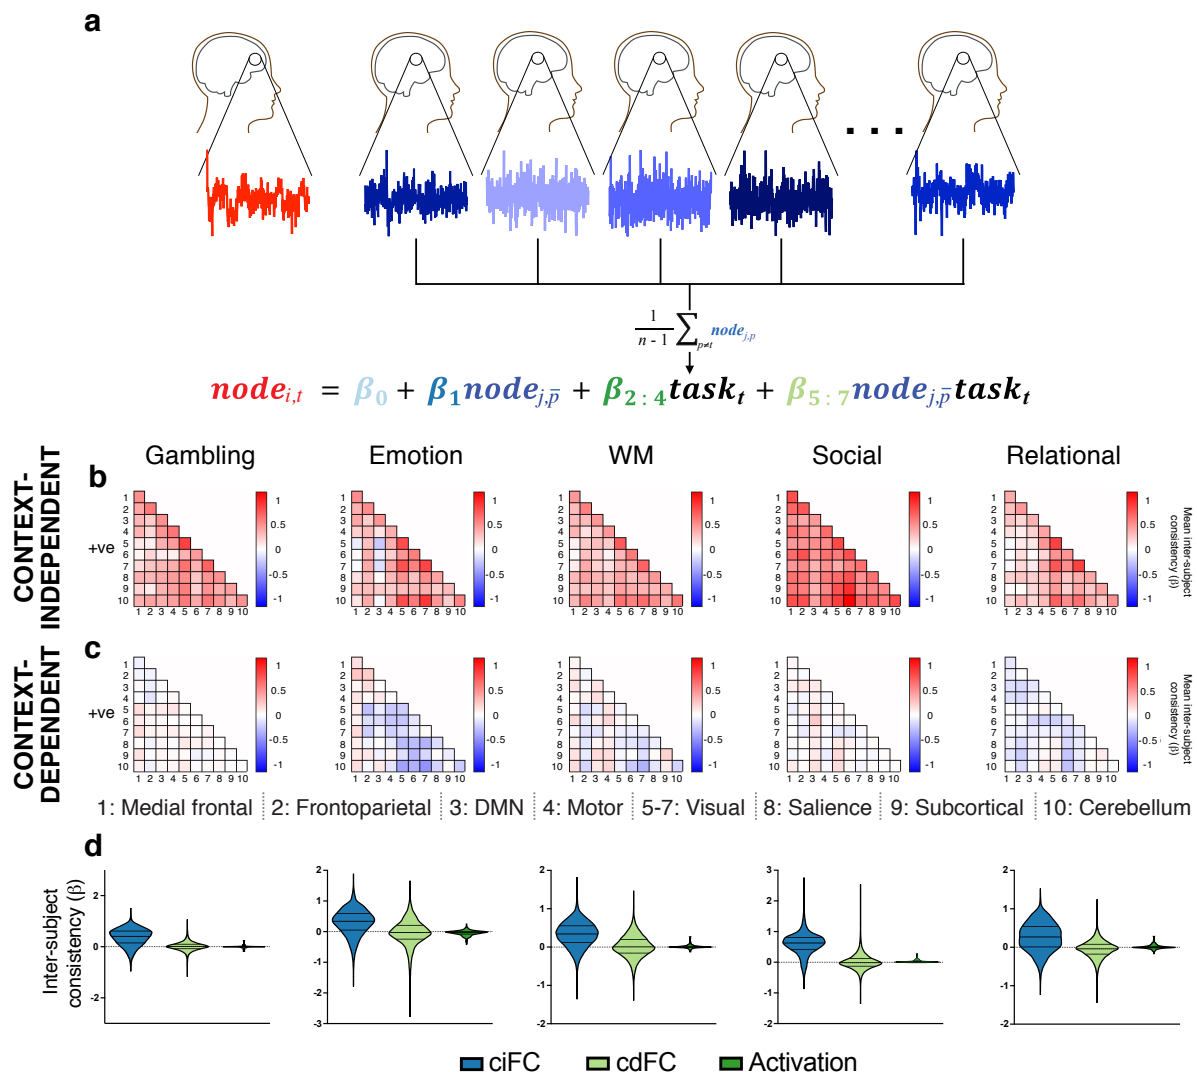

382 **Figure 4 with 2 supplements. Inter-subject PPI analysis reveals consistent task-induced**  
 384 **changes in context-independent and context-dependent activity across individuals.** (a)  
 384 Schematic depiction of the inter-subject PPI analysis pipeline, in which the target node  $i$  time  
 course is taken from subject  $t$ , and the predictor node  $j$  time course is averaged across all  
 386 remaining subjects  $p$ . (b,c) Network-level visualization of the substantial inter-subject

388 consistency for both context-independent and context-dependent signals. 1-10 = network  
assignment. (d) Violin plots (dashed line, median; dotted line, quartiles) of inter-subject  
390 consistency for all unique features (i.e., inter-subject PPI betas) reveal that inter-subject  
consistency of moment-to-moment fluctuations (ciFC) is greater than inter-subject consistency  
of block-level activation (“Activation”) or FC (cdFC) changes.  
392

*Inter-subject similarities and differences in task response contribute differentially to predictive  
394 models*

To explore the relationship between inter-subject consistency of task effects and  
396 predictive utility—and whether there is any spatial or functional structure to this relationship—  
we performed several analyses. First, we re-grouped reliably selected predictive features based  
398 on their absolute inter-subject consistency (see Methods) and visualized the network-level model  
contributions for these groups for ciFC (Figure 5a, top two rows) and cdFC (Figure 5a, bottom  
400 two rows). This analysis revealed that ciFC contributions are spatially distinct for high- and low-  
consistency edges, with predictive, high-consistency edges concentrated within medial frontal  
402 and visual networks, while predictive, low-consistency edges are more distributed across the  
brain. Differences in the spatial distribution of high- and low-consistency predictive cdFC edges  
404 are less pronounced, as demonstrated by higher rank correlations between vectorized high- and  
low-consistency predictive utility network matrices (Figure 5a) for cdFC than ciFC: ciFC  $r_s = -$   
406 0.30-0.37; cdFC  $r_s = 0.26-0.73$ ; mean within-task cdFC-ciFC difference = 0.3978, 95% CI = 0.15-  
0.65).

408 Next, we explicitly modeled the relationship between absolute inter-subject consistency  
and absolute predictive utility using a multilinear regression that included one additional term  
410 and the interaction between this term and inter-subject consistency (see Methods). To capture  
key anatomical and functional features for each edge, we used the following terms: mean  
412 absolute task effect size for the two nodes incident to the given edge (calculated as in Salehi et  
al., 2019; see Methods), edge membership between or within canonical networks, resting-state  
414 edge test-retest reliability (calculated as in Noble et al., 2017), edge length (i.e., Euclidean  
distance between incident nodes), and edge membership within or between hemispheres.  
416 Across these analyses, effects were more pronounced for ciFC than cdFC or task activation  
(where relevant; activation predictive utility was only modeled as a function of consistency and  
418 node activation, as the other edge-level metrics cannot meaningfully be applied to nodes). This  
is consistent with the finding that inter-subject consistency is greater for context-independent  
420 than context-dependent terms (Figure 4d), and thus would be expected to have a greater effect

on predictive utility for ciFC than for cdFC or activation; for completeness, we display results for  
422 all modeled terms (Figure 5b), but for clarity and concision, only ciFC effects are discussed.  
Overall, inter-subject consistency was negatively related to predictive utility, such that more  
424 consistent edges were less predictive. Interestingly, activation was also negatively related to  
predictive utility, suggesting that activated regions are connected by less predictive edges than  
426 non-activated regions. The interaction between inter-subject consistency and activation,  
however, was positive (Figure 5b, leftmost panel), suggesting that edges affected by task activity  
428 are more predictive when that effect is consistent across individuals. Network modeling results  
demonstrate that network membership does not itself affect predictive utility, but that predictive,  
430 consistent edges tend to be within-network, rather than between-network (Figure 5b, middle  
panel), consistent with the finding that high-consistency, predictive ciFC features tend to be  
432 concentrated within medial frontal and visual networks (Figure 5a, top row). Finally, reliability  
modeling results demonstrate that inter-subject consistency in this analysis does not simply  
434 recapitulate reliability, but that consistent, reliable edges are more predictive than consistent,  
unreliable edges (Figure 5b, rightmost panel). Because hemisphere and edge length were not  
436 clearly related to predictive utility, results for these analyses are displayed in Figure 5—figure  
supplement 1.



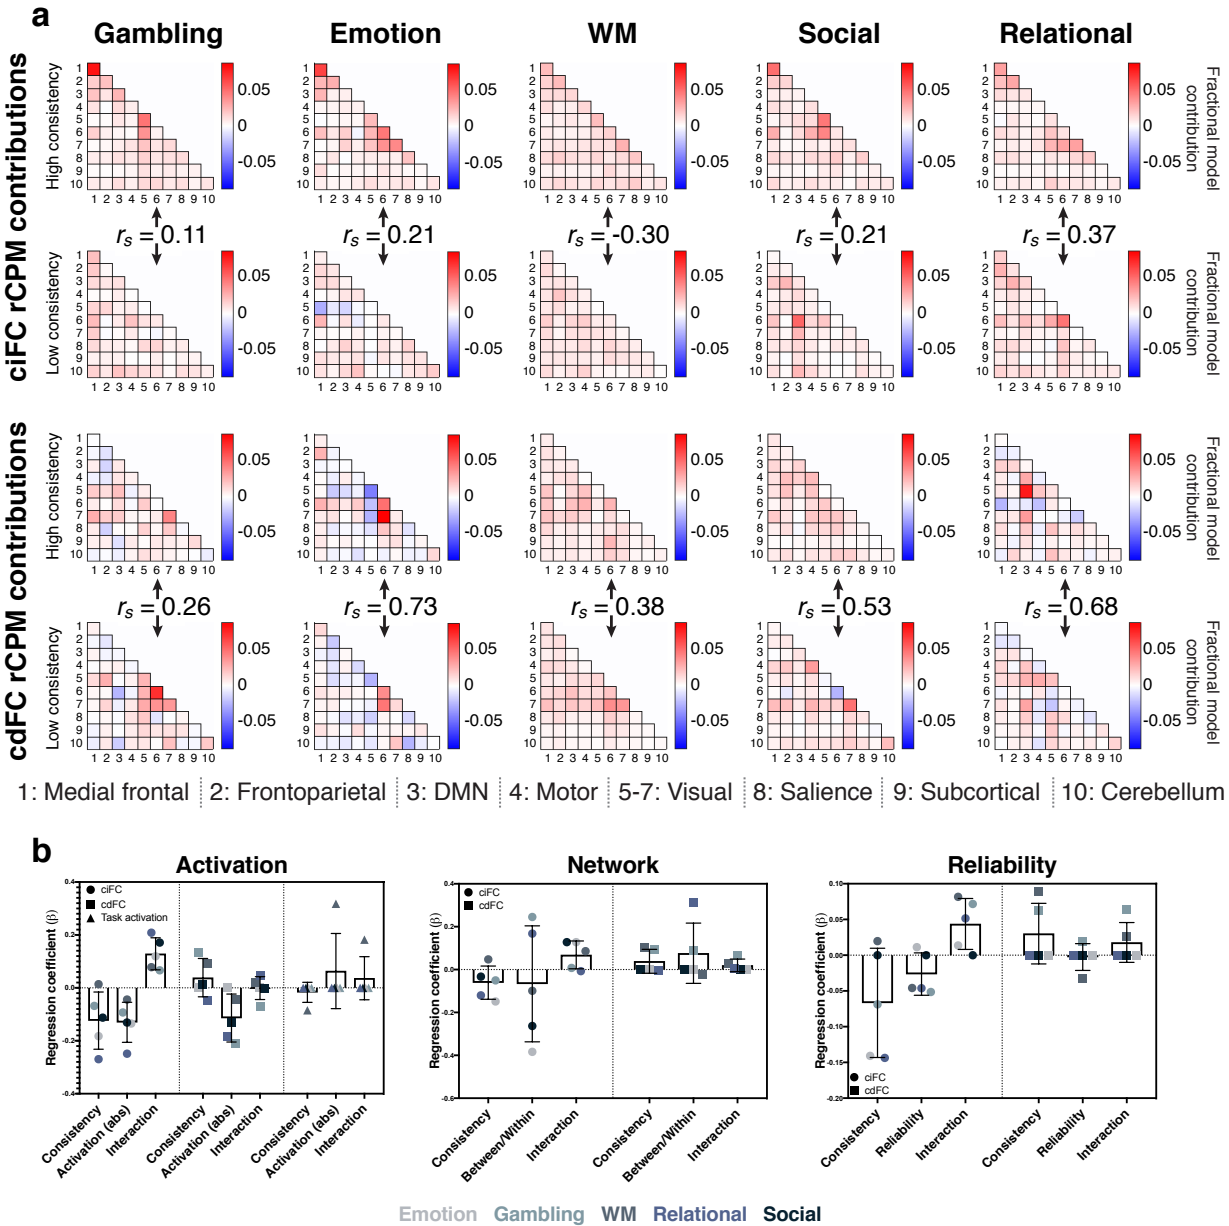

438

**Figure 5 with 1 supplement. Task fMRI-based prediction is driven primarily by individualized, distributed FC patterns, except within networks activated by the task.** (a) Visualization of predictive ciFC (top two rows) and cdFC (bottom two rows) features at the network level, with features divided by median inter-subject consistency.  $r_s$ , rank correlation between high- and low-consistency network matrices for the given task and term. 1-10 = network assignment. (b) Regression analyses relating the predictive utility of a feature's ciFC (all), cdFC (all), and activation ("Activation" only) to its inter-subject consistency, task activation, status between or within networks, resting-state test-retest reliability estimate, and relevant interactions. Results presented as regression coefficient for the given predictor in each of the five modeled tasks; bar height reflects mean coefficient; error bars indicate s.d. of coefficients.

450 **Discussion**

In-scanner tasks have been found to amplify individual differences in patterns of FC and correspondingly improve FC-based prediction of phenotype (Greene et al., 2018), but the nature of this improvement—whether it is due to changes in ciFC, cdFC, and/or activation patterns—remains unexplored. In this work, we leverage intra- and inter-subject PPI and predictive modeling analyses to ask this question. Despite substantial differences in the nature and design of the analyzed tasks, we found a striking consensus: task FC better reveals brain-phenotype relationships than resting-state FC due not to task-evoked co-activation, but rather to task-induced changes in patterns of context-independent and -dependent FC, as well as to the overall degree of task-induced change in patterns of activity and FC. Further, tasks do not simply emphasize individual differences in FC patterns; while predictive utility is generally boosted by amplification of such individual differences, precisely the opposite is true for edges between regions activated by the task. That is, in regions activated by the task, it is the similarities between individuals that allow us to find the differences.

464

#### *Anatomy of a successful predictive model*

While the FC and intercept terms are the most useful for prediction, it is noteworthy that the components of a given node's signal contain complementary (i.e., unique), phenotype-relevant information, such that their combination further improves predictive model performance for a given task; in fact, in many cases, the combined model performs better than would be expected given the performance of corresponding individual-term models. This is consistent with reports of improved ridge regression-based CPM performance with the inclusion of more relevant features in the model (up to a  $P$  value of 0.5 [Gao et al., 2019]). That is, in evaluating and weighting each component of the signal separately, the combined model is able to capture more information than is contained in any of its component parts, or in comparably preprocessed standard FC (Figure 2—figure supplement 3), even when incorrect task regressors are used (Figure 2—figure supplement 4). Similar efforts to reveal brain-phenotype relationships may therefore benefit from the inclusion of more features—even if their relationship to the phenotype of interest is relatively weak—in models that use regularization (Gao et al., 2019), although it is always wise to exclude uninformative features to avoid overfitting (Scheinost et al., 2019).

Interrogation of these combined models revealed that they are broadly distributed and relatively non-overlapping across terms (i.e., ciFC, cdFC, and activation), further highlighting the distinct, phenotype-relevant ways in which tasks alter each signal component and replicating the finding that task-related activation and context-dependent FC are spatially distinct (Di &

484 Biswal, 2018). Further, across all tasks, predictive FC patterns tend to be concentrated in medial  
frontal, frontoparietal, visual, and motor networks. These networks have all been previously  
486 implicated in successful FC-based predictive models of gF (Finn et al., 2015; Greene et al., 2018),  
but PPI-based prediction permits a more fine-grained evaluation of their involvement, revealing  
488 that medial frontal and frontoparietal networks are overrepresented in predictive *context-*  
*independent* FC edges, while visual and motor networks are overrepresented in predictive  
490 *context-dependent* FC edges (Figure 3i, Figure 3—figure supplement 1f). That is, while medial  
frontal and frontoparietal network FC is relevant to gF regardless of when in the task you look,  
492 block-level changes in visual and motor network FC predict gF. This is consistent with evidence  
that frontal and frontoparietal networks comprise domain-general, core components of task-set  
494 representations (Cole et al., 2013; Dosenbach et al., 2006), while visual and motor networks  
comprise domain-specific “data processing” systems (Posner & Petersen, 1990), which would  
496 be expected to adapt their operations to the nature and demands of the task at hand. This work  
is, to our knowledge, the first to parse and localize the differential predictive utility of context-  
498 independent FC and context-dependent FC. Results demonstrate the exciting potential of this  
analysis framework to understand the neural bases of successful predictive models, offering  
500 more nuanced insights into the neural representation of the predicted measure than would be  
accessible with standard FC-based models.

502 These findings are in line with the growing consensus that complex cognitive processes  
and constructs, such as fluid intelligence, are supported by distributed neural circuitry, rather  
504 than by circumscribed regions of interest (Turk-Browne, 2013), and demonstrate that rest-to-  
task FC changes, while perhaps small in magnitude (Cole et al., 2014), contain important  
506 information about phenotype independent of task-evoked activation. We of course do not  
suggest that co-activation cannot drive changes in FC (see, for example, Cole et al., 2019), but  
508 rather that *predictive* FC changes are not driven by co-activation.

#### 510 *A framework to explore task-specific effects on functional organization*

In addition to task-general predictive changes in FC, spatial localization of predictive  
512 features demonstrates the utility of this approach for drilling down into task-specific FC changes  
and their relationships to phenotypic measures. For example, the motor task is the only task for  
514 which context-dependent FC model contributions at the network level are consistently negative,  
indicating that the weaker an individual’s predictive context-dependent FC edges during motion,  
516 the higher that individual’s gF. Further, the finding that both edges that strengthen (i.e., mean

positive cdFC) and those that weaken (mean negative cdFC) during motion relative to fixation  
518 have negative context-dependent FC ridge coefficients (Figure 3—figure supplement 4) suggests  
that the relationship between context-dependent FC and gF depends more on total FC strength  
520 (i.e., globally weaker FC during motion predicts higher gF) than on the nature of task-induced  
change in FC (i.e., increased or decreased edge strength). It is possible that this task, given its  
522 low cognitive demands, does not require the widespread neural interactions that support higher-  
demand tasks (Di, Gohel, Kim, & Biswal, 2013), permitting mind wandering and decreased neural  
524 integration, which is energetically costly (Bullmore & Sporns, 2012; Di & Biswal, 2018).

While these preliminary results would be expected to depend to some extent on task  
526 design and modeling choices (Newell, 1973), they suggest a potentially fruitful direction for future  
investigation into the nature and cognitive implications of task-specific changes in functional  
528 brain organization. It is likely that such task-specific changes, by offering complementary insights  
into brain-phenotype relationships, explain the finding that combining FC data across task  
530 conditions often outperforms prediction using FC data from a single condition (Elliott et al., 2019;  
Gao et al., 2019). Better understanding these changes will enable more selective inclusion of  
532 data by condition, particularly when using data that include potentially less informative or noisy  
conditions (e.g., rest; Elliott et al., 2019).

534

#### *Inter-subject PPI reveals two classes of predictive functional connections*

536 The inter-subject correlation analyses are a novel extension of prior work on inter-subject  
correlation (Hasson, Nir, Levy, Fuhrmann, & Malach, 2004) and FC (Simony et al., 2016) that  
538 provide a complementary approach to study how tasks change patterns of FC to better reveal  
meaningful individual differences in them. Given the finding that tasks both increase inter-subject  
540 FC similarity and improve individual identifiability on the basis of FC patterns (Finn et al., 2017),  
we sought to explicitly explore the relationship between inter-subject time course synchrony (i.e.,  
542 consistency) and predictive utility: do tasks constrain the state space (Buckner, Krienen, & Yeo,  
2013; Elton & Gao, 2015; Leonardi, Shirer, Greicius, & Van De Ville, 2014), simultaneously making  
544 a relevant network more similar across individuals and amplifying signal components within it  
that vary across individuals, and/or are increased inter-subject consistency and increased  
546 predictive utility spatially separable? In fact, patterns of context-independent FC with high  
predictive utility are quite different for high- and low-consistency edges. While this was not the  
548 case for cdFC, inter-subject consistency was overall lower for cdFC than for ciFC, as might be  
expected given that interaction effects are less reliable than main effects (Di & Biswal, 2017);

550 future investigations may seek to explore these relationships in longer tasks to increase cdFC  
reliability. Regression analyses confirmed that the effect of inter-subject consistency on  
552 predictive utility is greater for context-independent than for context-dependent FC and  
activation. Specifically, more consistent context-independent FC patterns are less useful for  
554 prediction, but among consistent edges, those that are activated, more reliable, and within  
network tend to be most predictive.

556 Taken together, these results parallel two, complementary lines of human neuroscience  
research on task-induced changes in brain function: task activation studies, which identify clearly  
558 demarcated regions that are consistently activated by a task across individuals, and functional  
connectivity studies, which identify distributed, subtler task effects on patterns of brain activity  
560 outside of these consensus regions of activation (Cole et al., 2014; Horien et al., 2019; Salehi et  
al., 2019). The latter proved to be, overall, more useful for phenotypic prediction—in fact, task  
562 activation here failed to predict phenotype in every analysis. However, activation does have  
predictive relevance: in activated regions, functional connections that experience more similar  
564 task-induced changes across individuals are more predictive. When these regions are called  
upon to subserve a given task, their signals may become time-locked to the task (increasing  
566 inter-subject consistency [Hasson et al., 2004]) and/or more constrained (Buckner et al., 2013),  
amplifying signal components that may vary meaningfully across individuals (improving  
568 prediction accuracy). In non-activated regions, such consistency of moment-to-moment  
fluctuations was found to decrease the predictive utility of incident edges. These findings  
570 suggest that task-based FC better predicts phenotype than rest-based FC for two, regionally  
specific reasons: in regions where activity changes with task context, prediction is driven by  
572 edges between regions that change *in the same way* across people—that is, by edges  
connecting nodes that become time-locked to the task *and* more constrained to phenotypically  
574 relevant patterns of activity. Everywhere else in the brain, however, prediction is driven by  
diversity, by nodes that are doing different things in everyone, revealing inter-individual  
576 differences in FC patterns that reflect phenotype.

#### 578 *Additional considerations and future directions*

It is worth noting that our characterization of task effects is intentionally limited; given  
580 that blocked task designs are common and better powered to reveal effects of interest than  
event-related or mixed designs (Chee, Venkatraman, Westphal, & Siong, 2003; Friston, Zarahn,  
582 Josephs, Henson, & Dale, 1999), we chose to use simple, well-studied task condition contrasts

(Barch et al., 2013) to reveal fundamental, generalizable effects of task execution on FC and  
584 activation predictive utility. Further, regression analyses are here limited by the relatively small  
number of measurements (i.e., coefficient estimates for the five tasks that were used for both  
586 inter- and intra-subject analyses), which precludes the performance of rigorous statistical tests.  
Future application of the analysis framework presented here to independent datasets will provide  
588 opportunities to replicate, broaden (i.e., demonstrate their generalizability to different tasks and  
modeling approaches), and narrow (i.e., reveal task-specific changes in FC with phenotypic  
590 relevance) presented results.

Similarly, a deeper investigation of task-specific activation patterns may reveal that task-  
592 evoked activation here demonstrates little predictive utility because of the relatively large size of  
each node, which may blur informative, fine-scale patterns of activity and/or “wash out”  
594 activated voxels by grouping them with less activated voxels (Kriegeskorte, Goebel, & Bandettini,  
2006; Norman, Polyn, Detre, & Haxby, 2006; Turk-Browne, 2013). We note, however, that we do  
596 not seek to make claims about the predictive utility of task activation, but rather to demonstrate  
that task-induced changes in standard FC that improve phenotype prediction are not driven by  
598 task activation. As such, we chose to use a conventional parcellation to calculate FC (Finn et al.,  
2015; X. Shen et al., 2013), but future work may seek to compare the predictive utility of FC and  
600 task activation at a finer spatial scale.

## 602 *Conclusion*

As task-based FC gains popularity for individual differences research, a better  
604 understanding of how tasks change patterns of FC is critical. By demonstrating that the success  
of task FC-based predictive models is attributable to task-induced changes in context-  
606 independent FC, context-dependent FC, and overall task effect, but not to task-evoked  
activation alone, and by characterizing how tasks change patterns of context-independent FC  
608 to improve prediction, these findings demonstrate that reconfiguration of the functional  
connectome during in-scanner tasks is real, meaningful, and useful. This lays the foundation for  
610 intentional, precise use of in-scanner tasks to amplify individual differences in functional brain  
organization and more effectively map the neural representations of behaviors, traits, and clinical  
612 symptoms.

## 614 **Methods**

### *Dataset*

616 Data used in this work were released as part of the Human Connectome Project (HCP)  
S1200 release, described below.

618 *HCP participants.* We restricted our analyses to those subjects who completed all seven  
fMRI tasks (WM, gambling, language, social, relational, motor, and emotion), whose grand mean  
620 root mean square (RMS) relative motion across all task runs was less than 0.1 mm and whose  
maximum mean RMS relative motion was less than 0.16 mm, and for whom gF measures were  
622 available. One subject was found to be missing data due to a download failure, and was excluded  
from all analyses to ensure consistency with previous results. A similarly conservative threshold  
624 for motion-based exclusion has been previously demonstrated to mitigate the relationship  
between FC and gF measures (Greene et al., 2018). In total, data from 703 subjects were used  
626 (342 males, ages 22-37 years [mean = 28.5, s.d. = 3.8, median = 29]).

*HCP imaging parameters and preprocessing.* Details of imaging parameters (Stephen M  
628 Smith et al., 2013; Uğurbil et al., 2013; Van Essen et al., 2013) and preprocessing (Glasser et al.,  
2013; Stephen M Smith et al., 2013) have been published elsewhere. In brief, all fMRI data were  
630 acquired on a 3T Siemens Skyra using a slice-accelerated, multiband, gradient-echo, echo  
planar imaging (EPI) sequence (TR = 720 ms, TE = 33.1 ms, flip angle = 52 degrees, resolution =  
632 2.0 mm<sup>3</sup>, multiband factor = 8). Images acquired for each subject include a structural scan and  
eighteen fMRI scans (WM task, incentive processing [gambling] task, motor task, language  
634 processing task, social cognition task, relational processing task, emotion processing task, and  
two resting-state scans; two runs per condition [one left/right (LR) phase encoding run and one  
636 right/left (RL) phase encoding run]; Barch et al., 2013; Smith et al., 2013) split between two  
sessions. Data from the seven HCP tasks were used for this work, and each task was a different  
638 length (WM, 5:01; gambling, 3:12; language, 3:57; social, 3:27; relational, 2:56; motor, 3:34;  
emotion, 2:16). The scanning protocol (as well as procedures for obtaining informed consent  
640 from all participants) was approved by the Institutional Review Board at Washington University  
in St. Louis. Use of HCP data for these analyses was deemed exempt from IRB review by the  
642 Yale Human Investigation Committee. The HCP minimal preprocessing pipeline was used on  
these data (Glasser et al., 2013), which includes artifact removal, motion correction, and  
644 registration to standard space. All subsequent preprocessing was performed in BiImage Suite  
(Joshi et al., 2011) and included standard preprocessing procedures (Finn et al., 2015), including  
646 removal of motion-related components of the signal; regression of mean time courses in white  
matter and cerebrospinal fluid; removal of the linear trend; and temporal smoothing with a  
648 Gaussian filter,  $\sigma = 0.18$  (a relatively high low-pass filter designed to preserve potential high-

frequency, task-related signal components). Mean RMS relative motion was averaged for the LR  
650 and RL runs, yielding seven motion values per subject; these were used for subject exclusion  
and motion analyses (e.g., partial correlation-based feature selection). All subsequent analyses  
652 and visualizations were performed in Biolum Suite (Joshi et al., 2011), Matlab (Mathworks), R  
version 3.6.0 for macOS (packages: RColorBrewer [Neuwirth, 2014], ComplexHeatmap [Gu, Eils,  
654 & Schlesner, 2016], and circlize [Gu, Gu, Eils, Schlesner, & Brors, 2014]), and GraphPad Prism  
version 8.0 for macOS.

656

#### *Functional parcellation and network definition*

658 The Shen 268-node atlas (Finn et al., 2015; X. Shen et al., 2013) was applied to the HCP  
data, as described previously (Greene et al., 2018). This parcellation is derived from the  
660 application of a group-wise spectral clustering algorithm to an independent data set (X. Shen et  
al., 2013). Time courses of voxels within each node were averaged. Subjects without whole-brain  
662 coverage (i.e., with missing nodes) were excluded from all further analyses.

The same spectral clustering algorithm was used to assign these 268 nodes to eight  
664 networks (Finn et al., 2015; X. Shen et al., 2013), and the subcortical-cerebellar network was split  
into networks 8-10 (Noble et al., 2017; Figure 3—figure supplement 2). These networks are  
666 named based on their approximate correspondence to previously defined resting-state  
networks, and are numbered as follows: 1. Medial frontal, 2. Frontoparietal, 3. Default mode, 4.  
668 Motor, 5. Visual A, 6. Visual B, 7. Visual association, 8. Salience, 9. Subcortical, 10. Cerebellum.

#### *Psychophysiological interaction (PPI) analysis*

670 After parcellation, node time courses were submitted to an adaptation of the PPI pipeline  
developed and described by Cole and colleagues (Cole et al., 2013) and modeled after the  
672 generalized PPI framework (McLaren et al., 2012). In brief, the mean time course for each node  
was decomposed via multilinear regression with three regressor types: the mean time course of  
674 a predictor node (yielding a beta weight that reflects context-independent FC [ciFC] between the  
predictor and target nodes); zero-centered, block-level task boxcar regressors convolved with  
676 the canonical HRF (yielding a beta weight that reflects the influence of task activation on the  
target node time course), and the interactions of these terms (yielding a beta weight that reflects  
678 context-dependent FC [cdFC] between the predictor and target nodes). The canonical HRF  
(generated using SPM8) was used given its demonstrated efficacy in identifying patterns of task  
680 activation in these data (Barch et al., 2013). Task conditions and cues were modeled separately,



682 as relevant (WM: 0-back task, 2-back task, and cue regressors; language: story task and cue  
regressors; emotion: face block and cue regressors; gambling: reward block and loss block  
684 regressors; relational: relational block, matching block, and cue regressors; social: mental video  
block and random video block regressors; motor: left hand, right hand, left foot, right foot,  
686 tongue, and cue regressors). Regressors were calculated separately for each subject using HCP  
EV.txt files and downsampled given the HCP sampling rate (i.e., TR = 720 msec). Thus, for a  
688 given task with  $k$  conditions (including fixation and cue, if present), a given node's time course  
can be described by the following equation:

$$690 \quad v_i = \beta_0 + \beta_1 v_j + \beta_{2:k} T_{1:k-1} + \beta_{k+1:2k-1} f(T_{1:k-1}) v_j$$
$$f(T) = \begin{cases} 0.5 & \text{if } T > 0 \\ -0.5 & \text{if } T \leq 0 \end{cases}$$

692 where  $v_{i,j}$  are the z-scored time courses of target node  $i$  and predictor node  $j$ , and  $T$  is the  
relevant, HRF-convolved, zero-centered task timing regressor(s). As in previously published  
694 work (Cole et al., 2013), the task regressors used in the interaction term were binarized. Here,  
after convolution with the HRF, values greater than zero were set to 0.5, and values less than or  
696 equal to zero were set to -0.5 (to zero-center the binarized task regressors, as for the non-  
binarized task regressors) prior to their multiplication by the predictor node time course to yield  
698 the interaction regressor. (For a discussion of the choice to zero-center task regressors, see  
*Methods: Investigating potential confounds*). These steps are each depicted schematically in  
700 Figure 1—figure supplement 1. For all tasks except the emotion and language tasks (for which  
there were no fixation blocks, rendering the contrast implicit by modeling only one of the two  
702 task conditions) and the motor task (for which all motion conditions were summed to yield a  
motion versus fixation contrast), interaction and task activation beta weights were each  
704 combined via subtraction to yield one activation contrast beta weight and one interaction  
contrast beta weight per feature in each subject (McLaren et al., 2012; contrasts:  $n$ -back: 2-back  
706 – 0-back; gambling: reward – punish; emotion: fear [faces] versus neutral [shapes]; language:  
story versus math; relational: relation – match; social: TOM – random), and beta weights were  
708 calculated separately for each task run (i.e., LR and RL phase encoding runs) and then averaged.  
This process was repeated for every node pair (i.e., for a given target node, all other nodes were  
710 used as predictor nodes) and every subject, yielding, for each subject, four asymmetric, node-  
by-node matrices of beta weights (one each for the intercept, ciFC, task activation, and cdFC  
712 terms). Each task activation matrix was collapsed via averaging into a 268-element vector. All  
other matrices were symmetrized by averaging them with their transpose. All matrices (and

714 vectors, in the case of activation) of a given type were then submitted—alone and in  
combination—to the predictive modeling pipeline described below (*Cognitive prediction*).

716 Finally, to explore the effects of modeling task timing on resulting beta weights, we  
repeated the PPI using mismatched brain data and task regressors in an exhaustive fashion (e.g.,  
718 emotion task fMRI data with gambling, language, motor, relational, social, and WM task  
regressors). Resulting betas were also submitted to the cognitive prediction pipeline; results are  
720 presented in Figure 2—figure supplement 4.

## 722 *Cognitive prediction*

Fluid intelligence was quantified using a 24-item version of the Penn Progressive Matrices  
724 test; this test is an abbreviated form of Raven’s standard progressive matrices (Bilker et al.,  
2012). Integer scores indicate number of correct responses (PMAT24\_A\_CR, range = 5-24, mean  
726 = 17.70, s.d. = 4.43, median = 19).

A modified version of connectome-based predictive modeling (CPM; Finn et al., 2015;  
728 Shen et al., 2017) was used to predict gF from brain measures (i.e., beta matrices [see  
*Psychophysiological interaction analysis*]) using ridge regression (Gao et al., 2019). This pipeline  
730 predicts gF in novel subjects, validating the model through iterative,  $k$ -fold cross-validation; in  
this work,  $k = 10$  to balance model bias and variance given the large sample size (Scheinost et  
732 al., 2019). Consistent with this motivation, split-half (i.e.,  $k = 2$ ) analyses yielded comparable  
patterns of results (e.g., best performance from combined models), but overall lower prediction  
734 performance (Figure 2—figure supplement 8). First, the sample was divided into ten groups,  
respecting family structure such that family members were always assigned to the same group.  
736 Nine of these groups were used as training data; in this training set, features (edges and/or  
nodes) were selected on the basis of their Pearson correlation with gF scores. A correlation  $P$   
738 value of 0.1 was selected as the edge selection threshold, given evidence to suggest that more  
permissive feature selection yields improved regularized regression-based prediction results,  
740 and that  $P = 0.1$  offers an acceptable compromise between model performance and  
computational demands (Gao et al., 2019). These edges were then submitted as predictors (with  
742 gF score as response) to an L2-constrained linear least squares regression (elastic net mixing  
value =  $1e-6$ ), using another, inner 10-fold cross-validation to find the regression coefficients that  
744 correspond to the largest regularization strength ( $\lambda$ ) that yields a MSE within one standard  
deviation of the minimum MSE. These fitted coefficients were then applied to the corresponding

746 edges in the left-out test subjects to predict their phenotype scores, and these steps were  
performed iteratively with each group left out once.

748 Model performance was quantified as cross-validated  $r^2$ :  $q^2 = 1 - \frac{MSE}{var(y)}$ , where  $y =$   
observed gF scores. This whole pipeline was repeated 100 times with different group partitions,  
750 and model performance is reported as the mean across these 100 iterations (similarly, in  
graphical representations of results, bar heights represent mean performance, and error bars  
752 represent performance standard deviation). Significance of model performance was assessed  
via 100 iterations of nonparametric permutation testing (Finn et al., 2015), accounting for limits  
754 on exchangeability due to family structure (Winkler et al., 2014, 2015), and  $P$  values were  
calculated as the fraction of non-permuted iterations on which prediction accuracy was less than  
756 or equal to the accuracy of the best-performing null model for the given task and term. Two  
related subjects in our sample were missing family structure information; these subjects were  
758 excluded from permutation tests ( $n = 701$ ). Resulting  $P$  values were Bonferroni corrected for  
multiple comparisons. Last, for each task, a paired Wilcoxon signed rank test was used to  
760 compare performance across all 100 iterations of the two models with the highest and second-  
highest mean performance.

762

### *Evaluating and visualizing contributions to a predictive model*

764 Given the improved performance of the combined models relative to the individual-term  
models and the opportunity to interrogate relative term contributions to these combined models,  
766 we performed several analyses to evaluate the contributions of individual features, networks,  
and terms to the combined model for a given task. First, to ensure that only reliably predictive  
768 features were analyzed, a given feature was required to have been selected on 75% of all feature  
selections (10 folds \* 100 iterations = 1000 feature selections, for main analyses). The  
770 contribution of each selected feature was calculated as its mean ridge regression coefficients ( $b$ )  
across all 1000 analyses multiplied by the standard deviation of its PPI beta across subjects.  
772 That is, the contribution  $c$  for feature  $i$  was defined as

$$c_i = std(\beta_i^{PPI}) * \bar{b}_i^{ridge}$$

774 For all reliably selected features from a given term  $t$  (e.g., ciFC), the absolute values of these  
contributions were summed and converted to fractional contributions,

776

$$C_t = \frac{\sum_{i=1}^{N_t} |std(\beta_i^{PPI}) * \bar{b}_i^{ridge}|}{\sum_{t=1}^T \sum_{i=1}^{N_t} |std(\beta_i^{PPI}) * \bar{b}_i^{ridge}|}$$

where  $N_t$  represents the number of features from the given term  $t$  (with features that were not  
778 selected on 75% of feature selections set to 0) and  $T$  represents the number of terms. This  
procedure was repeated for each task to yield four contribution fractions per task (one per term).  
780 These contribution fractions were in turn used to drop terms in order of ascending and  
descending contributions, after which prediction was repeated to determine the impact of term  
782 contribution on model performance (Figure 2—figure supplement 5). Contributions across terms  
were compared using rank correlation of all features' absolute contributions (ciFC and cdFC); of  
784 all nodes' absolute contributions (cdFC contribution degree  $d_i = \sum_1^j abs(c_{i,j})$ , with  $d_i$  the degree  
for node  $i$ , and  $c_{i,j}$  the cdFC model contribution of the edge connecting nodes  $i$  and  $j$ ) with  
786 absolute task activation contributions; and of absolute task activation contributions with  
absolute task activation, itself.

788 Contributions were visualized at several levels of analysis; results are displayed for the  
motor task in Figure 3 and for all tasks in Figure 3—figure supplement 1. First, signed  
790 contributions of each feature were visualized in circle plots (Figure 3c, f, and Figure 3—figure  
supplement 1b, d). In these plots, nodes are grouped by canonical network (see *Functional*  
792 *parcellation and network definition*), and reliably selected edges are represented by lines  
between these nodes. The color family of each edge indicates the sign of its predictive  
794 contribution (red for positive, blue for negative), and the shade and thickness of the line represent  
the magnitude of its predictive contribution (darker and thicker indicate greater contribution).  
796 Figure 3c and Figure 3—figure supplement 1b circle plots illustrate the predictive contributions  
of ciFC features for each task. Figure 3f and Figure 3—figure supplement 1d circle plots illustrate  
798 the predictive contributions of context-dependent features with predictive utility. That is, lines  
again represent edges (here, cdFC), with the addition of node-level information. Nodes,  
800 displayed as circles on each circle plot track, are colored by their mean activation difference for  
the given contrast (e.g., 2-back – 0-back), and their distance from the x axis indicates their signed  
802 predictive contribution. To avoid any bias in task activation beta estimates from the inclusion of  
additional predictors in the PPI analysis (but see *Investigating potential confounds* and Figure  
804 2—figure supplement 2 for evidence that PPI task activation betas closely follow independently  
estimated task effect sizes), activation was calculated for this analysis and for the inter-subject  
806 consistency/utility regression (see *Modeling the relationship between inter-subject consistency*  
*and predictive utility*) as follows. As in work by Salehi and colleagues (Salehi et al., 2019), we  
808 used individual-level, volume-based task contrast of parameter estimate (COPE) files generated  
and described previously (Glasser et al., 2013) using FSL FEAT's FLAME (FMRIB's Local Analysis

810 of Mixed Effects [Smith et al., 2004]) to calculate effect size for each voxel. One-sample  $t$ -  
statistics were calculated at each voxel and converted to Cohen's  $d$  coefficients as  $d_s = \frac{t}{\sqrt{N}}$ ,  
812 where  $d_s$  is the sample  $d$  coefficient,  $t$  is the  $t$ -test statistic, and  $N$  is the sample size (J. Cohen,  
2013). We then applied the initial 268-parcel group-level parcellation (X. Shen et al., 2013) to  
814 these voxel-level maps to calculate a mean task effect size per parcel for each of the tasks.

Second, predictive contributions were visualized at the network level, using ten canonical  
816 networks (see *Functional parcellation and network definition*; Figures 3b, e, h, i, 4b, c, 5a, and  
Figure 3—figure supplement 1a, c, e, f, and Figure 3—figure supplements 3 and 4). Given the  
818 potentially divergent interpretations of the predictive contribution of a positive and a negative  
edge or node (e.g., a positive contribution for a negative edge suggests that it is less negative  
820 [weaker] in those with higher fluid intelligence, while the same contribution for a positive edge  
suggests that it is more positive [stronger] in those with higher fluid intelligence), edges were first  
822 divided by their mean ciFC sign (i.e., edges that, at baseline, are on average positive across all  
subjects, and edges that, at baseline, are on average negative across all subjects; Figure 3b, e,  
824 i, Figure 3—figure supplement 1a, c, f, and Figure 3—figure supplement 3), and nodes by their  
mean task activation sign (Figure 3h, Figure 3—figure supplement 1e). For each group, the  
826 signed contributions of selected edges from each network pair were summed, and this sum was  
normalized by the total number of edges between the given networks to account for differences  
828 in network size, yielding the mean contribution for an edge in the given network pair. Finally, to  
increase interpretability of the scale for these network-level contributions, each network pair's  
830 contribution value was normalized by the summed absolute contributions of all network pairs for  
that term in both positive and negative edge groups. This analysis was repeated, with minor  
832 modifications, for task activation for each network, rather than network pair. That is, activation  
predictive utility was summed for all nodes in each network, and this value was normalized by  
834 the number of nodes in that network; resulting network contributions were then normalized by  
the summed absolute contributions of all networks for that task in both positive and negative  
836 node groups. To explore any differences in the spatial distribution of high-consistency predictive  
edges and low-consistency predictive edges, this analysis was repeated after splitting the  
838 reliably selected edges not by mean ciFC sign, but rather by the median absolute inter-subject  
consistency (see *Inter-subject psychophysiological interaction analysis*) for these selected edges  
840 for the given term and task.

Finally, predictive contributions were visualized at the node level (Figure 3a, d, g). Node  
842 percent contribution was quantified as the summed, absolute contributions (i.e., predictive utility)  
of all edges incident to it (or, in the case of task activation, as the absolute predictive utility of  
844 the given node), normalized by the sum of all nodes' absolute predictive utility for the given task.  
Because the percent predictive utility of node activation calculated in this way tended to be  
846 sparsely concentrated (i.e., high percentages for a few nodes), the colormap range was set so  
as to balance capturing the full range of percentages across all tasks and terms and the subtle  
848 differences among nodes' ciFC and cdFC percent predictive utility. To do so, the maximum was  
set such that a small number of nodes' percent predictive utility of activation was saturated (0-  
850 10 nodes per task).

### 852 *Inter-subject psychophysiological interaction analysis*

To evaluate inter-subject consistency separately for ciFC, task activation, and cdFC, the  
854 intra-subject PPI analysis was repeated with one modification: the predictor node's time course  
was averaged across the subset of all subjects that did not include the target subject (and that  
856 experienced the same task stimulus order; range across tasks = 608-703 subjects), and this  
process was repeated iteratively with each subject serving once as the target subject, yielding,  
858 again, one asymmetric matrix per term for each subject. That is,

$$v_{i,t} = \beta_0 + \beta_1 v_{j\bar{p}} + \beta_{2:k} T_{1:k-1} + \beta_{k+1:2k-1} \text{bin}(T_{1:k-1}) v_{j\bar{p}}$$

$$860 \quad v_{j\bar{p}} = \frac{1}{n-1} \sum_{p \neq t} \mathbf{node}_{j,p}$$

where  $t$  is the target subject,  $p$  are the non-target subjects, and  $\mathbf{node}_{j,p}$  represents the time course  
862 of the  $j^{\text{th}}$  node for subject  $p$ . These matrices were averaged across all subjects, and, as before,  
contrasts were calculated, LR/RL contrast matrices averaged, and resulting beta contrast  
864 matrices symmetrized, yielding one matrix per term. Inter-subject consistency of task activation  
was defined as the main diagonal of the inter-subject interaction matrix. This was repeated for  
866 each of the five tasks for which task timing was meaningfully synchronized across subjects:  
gambling, emotion, WM, social, and relational. All subsequently described analyses using inter-  
868 subject consistency results were limited to these five tasks.

To explore the spatial distribution of ciFC and cdFC inter-subject consistency, the mean  
870 consistency of an edge in each canonical network pair was visualized (Figure 4b, c), using the  
same approach as in Figures 3 and 5 (see *Evaluating and visualizing contributions to a predictive*  
872 *model*), again after dividing these edges into those with mean positive ciFC and those with mean

negative ciFC (Figure 4—figure supplement 1c-d). We note that self-connections (e.g., node 1 –  
874 node 1) are constant in intra-subject analyses and thus non-contributory to predictive models.  
In inter-subject analyses, however, these self-connections correspond to inter-subject  
876 correlation (ISC; Hasson et al., 2004), or the similarity in a given node’s time course across  
individuals. These connections are thus neither positive nor negative in the intra-subject  
878 analyses, but are included in Figure 4b-c, and context-dependent ISC is interpreted as  
consistency of task activation across individuals in subsequent analyses.

880

#### *Modeling the relationship between inter-subject consistency and predictive utility*

882 To investigate a potential relationship between predictive utility and feature consistency  
across individuals, we designed a regression-based analysis in which the combined model  
884 predictive utility (i.e., absolute contribution) of each reliably selected feature for the given task  
and term was used as the outcome variable, and the inter-subject consistency of each reliably  
886 selected feature (i.e., absolute inter-subject PPI beta) for the corresponding task and term was  
used as a predictor. We suspected that this relationship may interact with functional and  
888 anatomical relationships; to this end, we built five separate models, each with a different  
functional or anatomical variable explicitly modeled as a predictor: edge location within or  
890 between canonical networks (Figure 5b), edge location within or across hemispheres (Figure 5—  
figure supplement 1b), edge length (as measured by Euclidean distance between the nodes  
892 incident to that edge; Figure 5—figure supplement 1a), edge reliability (calculated in HCP resting-  
state data by Noble and colleagues [Noble et al., 2017]; Figure 5b), and task activation (i.e., mean  
894 absolute task effect size [see *Evaluating and visualizing contributions to a predictive model*] of  
the nodes incident to the given edge; Figure 5b). All non-dummy predictors were mean-centered.  
896 Both main effects and interaction terms of models with significant full-model *P* values are  
presented; betas of non-significant models were set to 0. Due to the limited number of  
898 measurements (i.e., five betas per model term, one per task) output by this analysis, results are  
discussed qualitatively, with the caveat that future work to replicate these findings with more  
900 tasks will permit more rigorous statistical testing of them (see *Discussion*).

#### *Investigating potential confounds*

To evaluate the potential impact of collinearity on PPI beta estimates, intra- and inter-  
904 subject PPI analyses were repeated with two partial models for each task: one without the ciFC  
term and one without the cdFC term. Partial-model and full-model betas for each term were

906 highly correlated, suggesting a minimal impact of collinearity on beta estimates (Figure 1—figure supplement 2 and Figure 4—figure supplement 2).

908 To ensure that ciFC and task activation beta estimates are comparable to standard measures of FC and task activation, respectively, ciFC betas were correlated with FC calculated using Fisher-transformed Pearson correlations across the entire node time courses (“standard FC”), mean task activation betas were correlated with group-level task effect size measures calculated for each node (see *Evaluating and visualizing contributions to a predictive model*), and HCP-released, individual-level GLM results were correlated with PPI task activation betas and averaged across subjects, for all subjects in the main sample for whom individual-level GLM results were available ( $n = 322$ ; all results in Figure 2—figure supplement 2). These individual-level GLM-based task activation vectors (i.e., parcellated  $t$ -statistic maps generated in the task effect size analysis, yielding a 268-element vector of node activation values for each task for each subject) were also used to predict gF; results were comparable to prediction using PPI activation betas, confirming that task activation alone does not predict gF (Figure 2—figure supplement 2). For completeness, cdFC beta estimates were also correlated with standard FC. As predicted, results (Figure 2—figure supplement 2) demonstrate that ciFC is strongly correlated with standard FC and task activation betas with task effect size (both at the group and individual levels), but that cdFC is not significantly correlated with standard FC, validating the interpretation of PPI betas.

To further ensure that methodological choices did not affect main results, we repeated main analyses with mean-centered PPI regressors (that is, after z-scoring each PPI predictor immediately prior to the regression step). Prediction results were largely unchanged (Figure 2—figure supplement 1), though the intercept term, by definition, failed to predict gF in the mean-centered case (numerical error will yield intercept values that are close, but not equal, to zero, but this fluctuation around zero should not—and did not—predict gF). While at first surprising that prediction results are comparable using these two approaches, it follows from the similarity of task timing across subjects and from our choice to z-score node timecourses. That is, mean centering PPI regressors causes a linear scaling of resulting betas that is comparable across subjects, since  $\hat{\beta}_{standardized} = \hat{\beta}_{unstandardized} / s_{regressor}$ , and the standard deviation of task timing and of the interaction will be nearly identical across subjects. This linear shift in PPI betas will change their interpretation, but this change is not germane to the present work, as PPI betas themselves are not interpreted. However, with the exception of the intercept term, PPI betas’



938 predictive utility will be unchanged, since inter-subject relationships of PPI betas are relatively  
unchanged. Further, predictive utility estimates will be essentially unchanged, as ridge  
940 coefficients scale with PPI beta variance. The intercept will, of course, approach zero in the  
mean-centered case, but in the zero-centered case will reflect these linear shifts, scaled by  
942 subject-specific PPI activation and cdFC betas (Figure 2—figure supplement 1). If these betas  
meaningfully vary across subjects, then the intercept terms may predict individuals' phenotypes,  
944 as was found to be true in these analyses (Figure 2). Given the predictive utility of this “overall  
task effect” term (i.e., intercept), the unchanged prediction results for other terms, and the  
946 decreased collinearity among predictors after zero centering relative to mean centering, we  
present zero-centered results in the main text, and mean-centered results in the supplementary  
948 materials.

Finally, while standard approaches were taken to mitigate the effects of motion on fMRI  
950 data, we sought to more thoroughly explore any relationship of motion to task timing by  
correlating, for each subject, frame-to-frame displacement (HCP Movement\_RelativeRMS.txt)  
952 for each task and phase encoding direction with the corresponding task timing regressors.  
Results (Figure 2—figure supplement 10) demonstrate no consistent relationship. We also  
954 correlated mean RMS relative motion for each subject and task (averaged over phase encoding  
runs) with observed gF (Figure 2—figure supplement 6) and predicted gF (averaged over 100  
956 iterations for each task/term; Figure 2—figure supplement 7). Given several modest correlations,  
we repeated the prediction analyses using partial correlation-based feature selection with mean  
958 RMS relative motion (calculated for each subject and task) as a covariate. As an even more  
conservative motion control analysis, we also repeated the main analysis after regressing mean  
960 RMS relative motion out of gF and FC within the cross-validation loop. Regression coefficients  
were estimated for the training subjects and applied to the test subjects in the 10-fold analysis  
962 (to avoid the use of potentially unstable coefficient estimates in the smaller test sample), but  
were estimated separately for training and test subjects in the split-half analysis. Model  
964 performance and feature weights were relatively unchanged; the former is presented in Figure  
2—figure supplement 8, and the correlations of feature weights from main analyses and partial  
966 correlation-based analyses are presented in Figure 2—figure supplement 9. Correlations of  
feature weights from main analyses and residual-based analyses were comparable.

968

*Data and code availability*

970 The HCP data that support the findings of this study are publicly available on the ConnectomeDB  
database (<https://db.humanconnectome.org>). MATLAB code to run the ridge regression-based  
972 CPM analysis can be found at <https://github.com/YaleMRRC/CPM>. MATLAB code to run  
additional core analyses (PPI analyses, basic visualization, synchrony vs. predictiveness  
974 analyses, and family-based cross-validation) can be found at  
<https://github.com/abigailsgreene/taskFC>. BiImage Suite tools used for analysis and  
976 visualization can be accessed at [www.bisweb.yale.edu](http://www.bisweb.yale.edu). MATLAB and R scripts written to  
perform additional post-hoc analyses and visualizations are available from the authors upon  
978 request.

## 980 **Acknowledgments**

Data were provided by the Human Connectome Project, WU-Minn Consortium (Principal  
982 Investigators: David Van Essen and Kamil Ugurbil; 1U54MH091657) funded by the 16 NIH  
Institutes and Centers that support the NIH Blueprint for Neuroscience Research; and by the  
984 McDonnell Center for Systems Neuroscience at Washington University. The authors would like  
to thank Nick Turk-Browne and Daeyeol Lee for helpful discussions and suggestions.

986

## **Author contributions**

988 R.T.C., D.S., and A.S.G. designed the study. S.N. developed the scripts used to preprocess the  
HCP data, and A.S.G. preprocessed the data with guidance from S.N. S.G. developed and  
990 validated the ridge regression-based predictive modeling pipeline. A.S.G. developed and  
validated the PPI and visualization code and performed all analyses, with the exception of task  
992 effect size calculation (designed and overseen by S.N.). D.S. and R.T.C. supported result  
interpretation. A.S.G. wrote the manuscript, with comments from all authors.

994

## **Declaration of interests**

996 The authors declare no competing interests.

## References

- Barch, D. M., Burgess, G. C., Harms, M. P., Petersen, S. E., Schlaggar, B. L., Corbetta, M., ... Van Essen, D. C. (2013). Function in the human connectome: task-fMRI and individual differences in behavior. *NeuroImage*, *80*, 169–189. <https://doi.org/10.1016/j.neuroimage.2013.05.033>
- Bilker, W. B., Hansen, J. A., Brensinger, C. M., Richard, J., Gur, R. E., & Gur, R. C. (2012). Development of abbreviated nine-item forms of the Raven's standard progressive matrices test. *Assessment*, *19*(3), 354–369. <https://doi.org/10.1177/1073191112446655>
- Biswal, B., Yetkin, F. Z., Haughton, V. M., & Hyde, J. S. (1995). Functional connectivity in the motor cortex of resting human brain using echo-planar MRI. *Magnetic Resonance in Medicine*, *34*(4), 537–41. Retrieved from <http://www.ncbi.nlm.nih.gov/pubmed/8524021>
- Bolt, T., Nomi, J. S., Rubinov, M., & Uddin, L. Q. (2017). Correspondence between evoked and intrinsic functional brain network configurations. *Human Brain Mapping*, *38*(4), 1992–2007. <https://doi.org/10.1002/hbm.23500>
- Buckner, R. L., Krienen, F. M., & Yeo, B. T. T. (2013). Opportunities and limitations of intrinsic functional connectivity MRI. *Nature Neuroscience*, *16*(7), 832–837. <https://doi.org/10.1038/nn.3423>
- Bullmore, E., & Sporns, O. (2012). The economy of brain network organization. *Nature Reviews Neuroscience*, *13*(5), 336–349. <https://doi.org/10.1038/nrn3214>
- Chee, M. W. L., Venkatraman, V., Westphal, C., & Siong, S. C. (2003). Comparison of block and event-related fMRI designs in evaluating the word-frequency effect. *Hum. Brain Mapping*, *18*, 186–193. <https://doi.org/10.1002/hbm.10092>
- Cohen, J. (2013). *Statistical Power Analysis for the Behavioral Sciences*. Routledge. <https://doi.org/10.4324/9780203771587>
- Cohen, J. R. (2018). The behavioral and cognitive relevance of time-varying, dynamic changes in functional connectivity. *NeuroImage*, *180*, 515–525. <https://doi.org/10.1016/J.NEUROIMAGE.2017.09.036>
- Cole, M. W., Bassett, D. S., Power, J. D., Braver, T. S., & Petersen, S. E. (2014). Intrinsic and task-evoked network architectures of the human brain. *Neuron*, *83*(1), 238–251. <https://doi.org/10.1016/j.neuron.2014.05.014>
- Cole, M. W., Ito, T., Schultz, D., Mill, R., Chen, R., & Cocuzza, C. (2019). Task activations produce spurious but systematic inflation of task functional connectivity estimates. *NeuroImage*, *189*, 1–18. <https://doi.org/10.1016/J.NEUROIMAGE.2018.12.054>
- Cole, M. W., Reynolds, J. R., Power, J. D., Repovs, G., Anticevic, A., & Braver, T. S. (2013). Multi-task connectivity reveals flexible hubs for adaptive task control. *Nature Neuroscience*, *16*(9), 1348–1355. <https://doi.org/10.1038/nn.3470>
- Di, X., & Biswal, B. B. (2017). Psychophysiological interactions in a visual checkerboard task: reproducibility, reliability, and the effects of deconvolution. *Frontiers in Neuroscience*, *11*, 573. <https://doi.org/10.3389/fnins.2017.00573>
- Di, X., & Biswal, B. B. (2018). Toward task connectomics: examining whole-brain task modulated connectivity in different task domains. *Cerebral Cortex*, 1–12. <https://doi.org/10.1093/cercor/bhy055>
- Di, X., Gohel, S., Kim, E. H., & Biswal, B. B. (2013). Task vs. rest-different network configurations between the coactivation and the resting-state brain networks. *Frontiers in Human Neuroscience*, *7*, 493. <https://doi.org/10.3389/fnhum.2013.00493>
- Dosenbach, N. U. F., Visscher, K. M., Palmer, E. D., Miezin, F. M., Wenger, K. K., Kang, H. C., ... Petersen, S. E. (2006). A core system for the implementation of task sets. *Neuron*,

- 50(5), 799–812. <https://doi.org/10.1016/j.neuron.2006.04.031>
- Dubois, J., Galdi, P., Han, Y., Paul, L. K., & Adolphs, R. (2018). Resting-state functional brain connectivity best predicts the personality dimension of openness to experience. *Personality Neuroscience*, 1. <https://doi.org/10.1017/pen.2018.8>
- Elliott, M. L., Knodt, A. R., Cooke, M., Kim, M. J., Melzer, T. R., Keenan, R., ... Hariri, A. R. (2019). General functional connectivity: Shared features of resting-state and task fMRI drive reliable and heritable individual differences in functional brain networks. *NeuroImage*, 189, 516–532. <https://doi.org/10.1016/J.NEUROIMAGE.2019.01.068>
- Elton, A., & Gao, W. (2015). Task-related modulation of functional connectivity variability and its behavioral correlations. *Human Brain Mapping*, 36(8), 3260–3272. <https://doi.org/10.1002/hbm.22847>
- Finn, E. S., Scheinost, D., Finn, D. M., Shen, X., Papademetris, X., & Constable, R. T. (2017). Can brain state be manipulated to emphasize individual differences in functional connectivity? *NeuroImage*, 160, 140–151. <https://doi.org/10.1016/j.neuroimage.2017.03.064>
- Finn, E. S., Shen, X., Scheinost, D., Rosenberg, M. D., Huang, J., Chun, M. M., ... Constable, R. T. (2015). Functional connectome fingerprinting: identifying individuals using patterns of brain connectivity. *Nature Neuroscience*, 18(11), 1664–1671. <https://doi.org/10.1038/nn.4135>
- Friston, K. J., Zarahn, E., Josephs, O., Henson, R. N. A., & Dale, A. M. (1999). Stochastic designs in event-related fMRI. *NeuroImage*, 10(5), 607–619. <https://doi.org/10.1006/NIMG.1999.0498>
- Gao, S., Greene, A. S., Constable, R. T., & Scheinost, D. (2019). Combining multiple connectomes improves predictive modeling of phenotypic measures. *NeuroImage*, 201, 116038. <https://doi.org/10.1016/J.NEUROIMAGE.2019.116038>
- Glasser, M. F., Sotiropoulos, S. N., Wilson, J. A., Coalson, T. S., Fischl, B., Andersson, J., ... Jenkinson, M. (2013). The minimal preprocessing pipelines for the Human Connectome Project. *NeuroImage*, 80, 105–124. <https://doi.org/10.1016/j.neuroimage.2013.04.127>
- Gratton, C., Laumann, T. O., Nielsen, A. N., Greene, D. J., Gordon, E. M., Gilmore, A. W., ... Petersen, S. E. (2018). Functional brain networks are dominated by stable group and individual factors, not cognitive or daily variation. *Neuron*, 98(2), 439–452.e5. <https://doi.org/10.1016/j.neuron.2018.03.035>
- Greene, A. S., Gao, S., Scheinost, D., & Constable, R. T. (2018). Task-induced brain state manipulation improves prediction of individual traits. *Nature Communications*, 9(1), 2807. <https://doi.org/10.1038/s41467-018-04920-3>
- Gu, Z., Eils, R., & Schlesner, M. (2016). Complex heatmaps reveal patterns and correlations in multidimensional genomic data. *Bioinformatics*, 32(18), 2847–2849. <https://doi.org/10.1093/bioinformatics/btw313>
- Gu, Z., Gu, L., Eils, R., Schlesner, M., & Brors, B. (2014). circlize implements and enhances circular visualization in R. *Bioinformatics*, 30(19), 2811–2812. <https://doi.org/10.1093/bioinformatics/btu393>
- Hasson, U., Nir, Y., Levy, I., Fuhrmann, G., & Malach, R. (2004). Intersubject synchronization of cortical activity during natural vision. *Science*, 303(5664), 1634–1640.
- Horien, C., Greene, A. S., Constable, R. T., & Scheinost, D. (2019). Regions and connections: complementary approaches to characterize brain organization and function. *The Neuroscientist*, 1–17. <https://doi.org/10.1177/1073858419860115>
- Hsu, W.-T., Rosenberg, M. D., Scheinost, D., Constable, R. T., & Chun, M. M. (2018). Resting-state functional connectivity predicts neuroticism and extraversion in novel individuals. *Social Cognitive and Affective Neuroscience*, 13(2), 224–232.

- <https://doi.org/10.1093/scan/nsy002>
- Joshi, A., Scheinost, D., Okuda, H., Belhachemi, D., Murphy, I., Staib, L. H., & Papademetris, X. (2011). Unified framework for development, deployment and robust testing of neuroimaging algorithms. *Neuroinformatics*, 9(1), 69–84. <https://doi.org/10.1007/s12021-010-9092-8>
- Kieliba, A. P., Madugula, S., Filippini, N., & Duff, E. P. (2019). Large-scale intrinsic connectivity is consistent across varying task demands. *PLoS ONE*, 14(4), e0213861. <https://doi.org/https://doi.org/10.1371/journal.pone.0213861>
- Kriegeskorte, N., Goebel, R., & Bandettini, P. (2006). Information-based functional brain mapping. *Proceedings of the National Academy of Sciences*, 103(10), 3863–3868. <https://doi.org/10.1073/pnas.0600244103>
- Krienen, F. M., Yeo, B. T. T., & Buckner, R. L. (2014). Reconfigurable task-dependent functional coupling modes cluster around a core functional architecture. *Philosophical Transactions of the Royal Society of London. Series B, Biological Sciences*, 369(1653). <https://doi.org/10.1098/rstb.2013.0526>
- Leonardi, N., Shirer, W. R., Greicius, M. D., & Van De Ville, D. (2014). Disentangling dynamic networks: Separated and joint expressions of functional connectivity patterns in time. *Human Brain Mapping*, 35(12), 5984–5995. <https://doi.org/10.1002/hbm.22599>
- Li, J., Kong, R., Liégeois, R., Orban, C., Tan, Y., Sun, N., ... Yeo, B. T. T. (2019). Global signal regression strengthens association between resting-state functional connectivity and behavior. *NeuroImage*, 196, 126–141. <https://doi.org/10.1016/J.NEUROIMAGE.2019.04.016>
- Liu, T. T., Nalci, A., & Falahpour, M. (2017). The global signal in fMRI: Nuisance or information? *NeuroImage*, 150, 213–229. <https://doi.org/10.1016/j.neuroimage.2017.02.036>
- Lynch, L. K., Lu, K.-H., Wen, H., Zhang, Y., Saykin, A. J., & Liu, Z. (2018). Task-evoked functional connectivity does not explain functional connectivity differences between rest and task conditions. *Human Brain Mapping*, 39(12), 4939–4948. <https://doi.org/10.1002/hbm.24335>
- McLaren, D. G., Ries, M. L., Xu, G., & Johnson, S. C. (2012). A generalized form of context-dependent psychophysiological interactions (gPPI): a comparison to standard approaches. *NeuroImage*, 61(4), 1277–86. <https://doi.org/10.1016/j.neuroimage.2012.03.068>
- Medaglia, J. D., Lynall, M.-E., & Bassett, D. S. (2015). Cognitive network neuroscience. *Journal of Cognitive Neuroscience*, 27(8), 1471–1491. [https://doi.org/10.1162/jocn\\_a\\_00810](https://doi.org/10.1162/jocn_a_00810)
- Neuwirth, E. (2014). RColorBrewer. *R Package Version 1.1-2*. Retrieved from <https://cran.r-project.org/package=RColorBrewer>
- Newell, A. (1973). *You can't play 20 questions with nature and win: projective comments on the papers of this symposium*. Retrieved from <http://repository.cmu.edu/compsci>
- Noble, S., Spann, M. N., Tokoglu, F., Shen, X., Constable, R. T., & Scheinost, D. (2017). Influences on the test–retest reliability of functional connectivity MRI and its relationship with behavioral utility. *Cerebral Cortex*, 27(11), 5415–5429. <https://doi.org/10.1093/cercor/bhx230>
- Norman, K. A., Polyn, S. M., Detre, G. J., & Haxby, J. V. (2006). Beyond mind-reading: multi-voxel pattern analysis of fMRI data. *Trends in Cognitive Sciences*, 10(9), 424–430. <https://doi.org/10.1016/j.tics.2006.07.005>
- Posner, M. I., & Petersen, S. E. (1990). The attention system of the human brain. *Annual Review of Neuroscience*, 13, 25–42.
- Power, J. D., Schlaggar, B. L., & Petersen, S. E. (2014). Studying brain organization via spontaneous fMRI signal. *Neuron*, 84(4), 681–696.

- <https://doi.org/10.1016/j.neuron.2014.09.007>
- Rosenberg, M. D., Finn, E. S., Scheinost, D., Papademetris, X., Shen, X., Constable, R. T., & Chun, M. M. (2015). A neuromarker of sustained attention from whole-brain functional connectivity. *Nature Neuroscience*, *19*(1), 165–171. <https://doi.org/10.1038/nn.4179>
- Salehi, M., Greene, A. S., Karbasi, A., Shen, X., Scheinost, D., & Constable, R. T. (2019). There is no single functional atlas even for a single individual: Functional parcel definitions change with task. *NeuroImage*, 116366. <https://doi.org/10.1016/J.NEUROIMAGE.2019.116366>
- Scheinost, D., Noble, S., Horien, C., Greene, A. S., Lake, E. M., Salehi, M., ... Constable, R. T. (2019). Ten simple rules for predictive modeling of individual differences in neuroimaging. *NeuroImage*, *193*, 35–45. <https://doi.org/10.1016/J.NEUROIMAGE.2019.02.057>
- Shen, X., Finn, E. S., Scheinost, D., Rosenberg, M. D., Chun, M. M., Papademetris, X., & Constable, R. T. (2017). Using connectome-based predictive modeling to predict individual behavior from brain connectivity. *Nature Protocols*, *12*(3), 506–518. <https://doi.org/10.1038/nprot.2016.178>
- Shen, X., Tokoglu, F., Papademetris, X., & Constable, R. T. (2013). Groupwise whole-brain parcellation from resting-state fMRI data for network node identification. *NeuroImage*, *82*, 403–415. <https://doi.org/10.1016/j.neuroimage.2013.05.081>
- Simony, E., Honey, C. J., Chen, J., Lositsky, O., Yeshurun, Y., Wiesel, A., & Hasson, U. (2016). Dynamic reconfiguration of the default mode network during narrative comprehension. *Nature Communications*, *7*, 12141. <https://doi.org/10.1038/ncomms12141>
- Smith, S. M., Beckmann, C. F., Andersson, J., Auerbach, E. J., Bijsterbosch, J., Douaud, G., ... Glasser, M. F. (2013). Resting-state fMRI in the Human Connectome Project. *NeuroImage*, *80*(80), 144–168. <https://doi.org/10.1016/j.neuroimage.2013.05.039>
- Smith, S. M., Fox, P. T., Miller, K. L., Glahn, D. C., Fox, P. M., Mackay, C. E., ... Beckmann, C. F. (2009). Correspondence of the brain's functional architecture during activation and rest. *Proceedings of the National Academy of Sciences of the United States of America*, *106*(31), 13040–13045. <https://doi.org/10.1073/pnas.0905267106>
- Smith, S. M., Jenkinson, M., Woolrich, M. W., Beckmann, C. F., Behrens, T. E. J., Johansen-Berg, H., ... Matthews, P. M. (2004). Advances in functional and structural MR image analysis and implementation as FSL. *Neuroimage*, *23*(SUPPL. 1), S208–S219. <https://doi.org/10.1016/j.neuroimage.2004.07.051>
- Turk-Browne, N. B. (2013). Functional interactions as big data in the human brain. *Science*, *342*(6158), 580–584. Retrieved from <http://science.sciencemag.org/content/342/6158/580.full>
- Uğurbil, K., Xu, J., Auerbach, E. J., Moeller, S., Vu, A. T., Duarte-Carvajalino, J. M., ... Yacoub, E. (2013). Pushing spatial and temporal resolution for functional and diffusion MRI in the Human Connectome Project. *NeuroImage*, *80*(80), 80–104. <https://doi.org/10.1016/j.neuroimage.2013.05.012>
- Van Essen, D. C., Smith, S. M., Barch, D. M., Behrens, T. E. J., Yacoub, E., & Ugurbil, K. (2013). The WU-Minn Human Connectome Project: an overview. *NeuroImage*, *80*(80), 62–79. <https://doi.org/10.1016/j.neuroimage.2013.05.041>
- Wager, T. D., Atlas, L. Y., Lindquist, M. A., Roy, M., Woo, C.-W., & Kross, E. (2013). An fMRI-based neurologic signature of physical pain. *New England Journal of Medicine*, *368*(15), 1388–1397. <https://doi.org/10.1056/NEJMoa1204471>
- Winkler, A. M., Ridgway, G. R., Webster, M. A., Smith, S. M., & Nichols, T. E. (2014). Permutation inference for the general linear model. *NeuroImage*, *92*, 381–397. <https://doi.org/10.1016/j.neuroimage.2014.01.060>
- Winkler, A. M., Webster, M. A., Vidaurre, D., Nichols, T. E., & Smith, S. M. (2015). Multi-level

block permutation. *NeuroImage*, 123, 253–268.  
<https://doi.org/10.1016/j.neuroimage.2015.05.092>

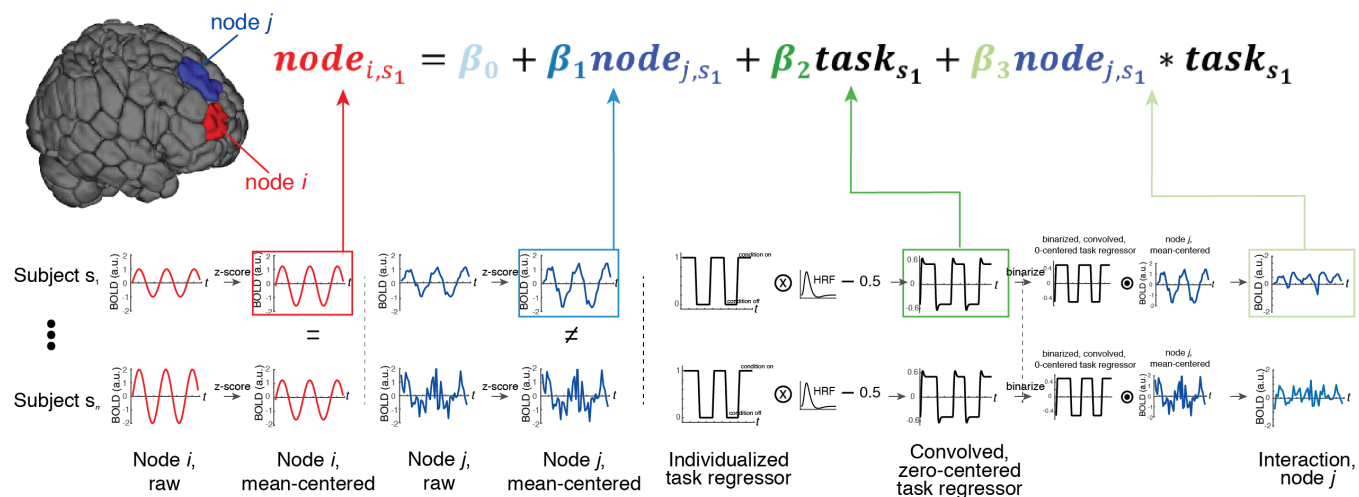

**Figure 1 – figure supplement 1.** Schematic depiction of the PPI analysis pipeline.



|                   | <b>Intercept,<br/>no cdFC</b> | <b>Intercept,<br/>no ciFC</b> | <b>ciFC, no<br/>cdFC</b> | <b>Activation,<br/>no cdFC</b> | <b>Activation,<br/>no ciFC</b> | <b>cdFC, no<br/>ciFC</b> |
|-------------------|-------------------------------|-------------------------------|--------------------------|--------------------------------|--------------------------------|--------------------------|
| <b>Gambling</b>   | 0.9910                        | 0.9587                        | 0.969                    | 0.9941                         | 0.9749                         | 0.7439                   |
| <b>Emotion</b>    | 0.9892                        | 0.9654                        | 0.9918                   | 0.9903                         | 0.9569                         | 0.9343                   |
| <b>Language</b>   | 0.9779                        | 0.9337                        | 0.9617                   | 0.9877                         | 0.9558                         | 0.7679                   |
| <b>Motor</b>      | 0.9754                        | 0.9961                        | 0.5986                   | 0.9751                         | 0.9915                         | 0.7329                   |
| <b>Relational</b> | 0.9821                        | 0.9438                        | 0.9881                   | 0.9878                         | 0.9542                         | 0.9290                   |
| <b>Social</b>     | 0.9868                        | 0.9275                        | 0.9661                   | 0.9925                         | 0.9570                         | 0.7050                   |
| <b>WM</b>         | 0.9848                        | 0.9228                        | 0.9862                   | 0.9891                         | 0.9548                         | 0.8920                   |

**Figure 1 – figure supplement 2.** Mean Pearson correlation coefficients between full-model PPI betas and partial-model PPI betas for a given term, computed within subject (separately for LR and RL runs) and averaged across subjects and then conditions (e.g. cue, 2-back, and 0-back terms for WM).

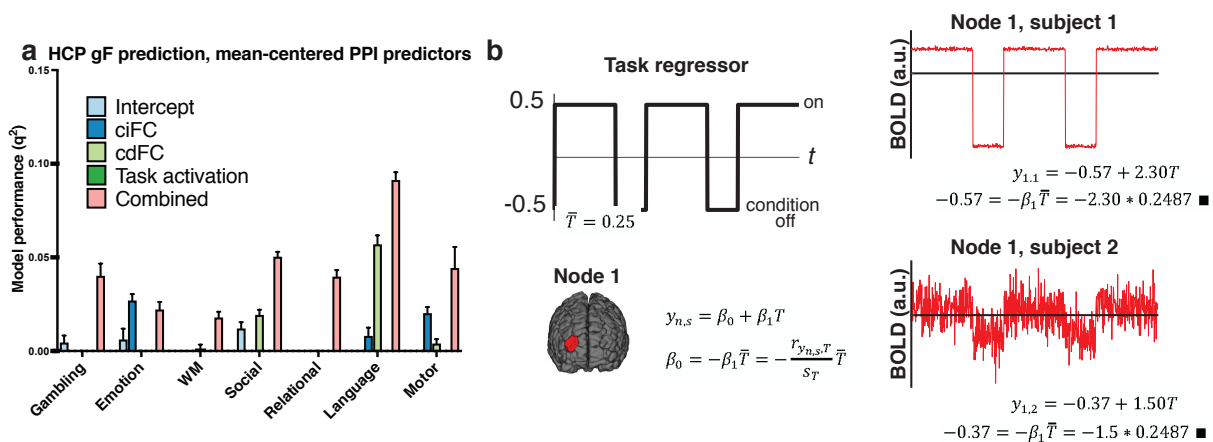

**Figure 2—figure supplement 1.** PPI intercept reflects overall degree of task effect on brain activity patterns, and has predictive utility. (a) Eliminating PPI model intercepts by mean centering all regressors (rather than zero centering task regressors and mean centering node time courses, as in main analyses) has little effect on prediction performance (mean and s.d., indicated by error bars) of ciFC, cdFC, activation, or combined models (c.f., Fig. 2b) because removal of a constant term (that is similar across subjects) from regressors scales beta estimates in a linear fashion, and thus does not affect their phenotypically relevant information content. However, the intercept reflects this constant term, weighted by activation and interaction betas, which may vary across subjects, reflecting inter-individual differences in overall degree of task effect on node activity and FC; should this inter-individual variance be related to gF, PPI intercept terms would be expected to successfully predict gF, as was found to be the case for 4/7 tasks (Fig. 2). (b) Schematic illustration of this interpretation of the intercept term. Here, task timing is represented as a zero-centered boxcar, yielding a mean task regressor value of 0.25 (because more time is spent in the “on” condition than in the “off” condition). Example node 1 time courses for two subjects are depicted in the rightmost panel; in subject 1, node 1 is strongly activated by the task, while in subject 2, node 1 is more weakly activated by the task, as reflected in the  $\beta_1$  estimates for these subjects. This difference, in turn, determines the intercept values for each subject. This simple case excludes the PPI interaction term, but the same logic would hold for this term, rendering the intercept a reflection of the overall degree to which the task affects activation and connectivity of the target node, a value which may vary meaningfully across individuals. T, task regressor; y, node time course of activity; n, node; s, subject; r, Pearson correlation; s, standard deviation.

|                   | ciFC/standard<br>FC corr | cdFC/standard<br>FC corr | Act.<br>PPI/GLM<br>grp corr | Act.<br>PPI/GLM<br>IS corr | GLM-based<br>model<br>performance |
|-------------------|--------------------------|--------------------------|-----------------------------|----------------------------|-----------------------------------|
| <b>Emotion</b>    | 0.973                    | -0.0975 (0.25)           | 0.9360                      | 0.9196                     | -0.0093                           |
| <b>Gambling</b>   | 0.9364                   | -0.0049 (0.35)           | 0.7798                      | 0.6725<br>(0.0001)         | -0.0090                           |
| <b>Language</b>   | 0.9512                   | 0.0206 (0.39)            | 0.9363                      | 0.9369                     | -0.0100                           |
| <b>Motor</b>      | 0.6499                   | -0.0717(0.43)            | 0.8897                      | 0.8259<br>(0.0001)         | -0.0101                           |
| <b>Relational</b> | 0.9546                   | -0.0123 (0.34)           | 0.9457                      | 0.7760                     | -0.0092                           |
| <b>Social</b>     | 0.9278                   | -0.0064 (0.42)           | 0.92                        | 0.8198                     | -0.0099                           |
| <b>WM</b>         | 0.9554                   | -0.0428 (0.35)           | 0.9472                      | 0.8448<br>(0.0016)         | -0.0087                           |

**Figure 2—figure supplement 2.** Comparison of PPI results to “standard” FC and activation results. Columns 1-2: Pearson correlations of context-independent and context-dependent FC for each task with standard FC from that task, computed within subject and averaged across subjects to yield mean  $r(P, \text{Bonferroni corrected})$ .  $P$  value not reported indicates  $P \ll 0.001$ . Column 3: Pearson correlations of task activation PPI betas (averaged across subjects) with independently estimated, group-level HCP task effect sizes per node. All  $P \ll 0.001$ , Bonferroni corrected. Column 4: Pearson correlations of task activation PPI betas with independently estimated, individual-level HCP task effect sizes per node; intra-subject correlations averaged across subjects and presented as mean  $r(P, \text{Bonferroni corrected})$ .  $P$  value not reported indicates  $P \ll 0.001$ . Column 5: performance of gF predictive models trained and tested with GLM-based activation, rather than PPI-based activation. Results reported as mean  $q^2$  across 100 iterations of 10-fold cross-validation. Act, activation; corr, correlation; grp, group; IS, intra-subject.

|                   | <b>Prediction performance, no<br/>GSR</b> | <b>Prediction performance, with GSR</b> |
|-------------------|-------------------------------------------|-----------------------------------------|
| <b>Emotion</b>    | 0.0305 (0.0053)                           | 0.0771 (0.0036)                         |
| <b>Gambling</b>   | -0.0017 (0.0028)                          | 0.1028 (0.0047)                         |
| <b>Language</b>   | 0.0387 (0.0046)                           | 0.1046 (0.0035)                         |
| <b>Motor</b>      | -0.0029 (0.0024)                          | 0.0823 (0.0051)                         |
| <b>Relational</b> | 0.0280 (0.0068)                           | 0.0990 (0.0047)                         |
| <b>Social</b>     | -0.0042 (0.002)                           | 0.0872 (0.0044)                         |
| <b>WM</b>         | -0.0029 (0.0022)                          | 0.1092 (0.0037)                         |

**Figure 2—figure supplement 3.** Prediction performance of rCPM (100 iterations,  $P$  threshold = 0.1) performed on “standard FC,” with and without global signal regression (GSR). Results presented as mean  $q^2$  (s.d.  $q^2$ ).

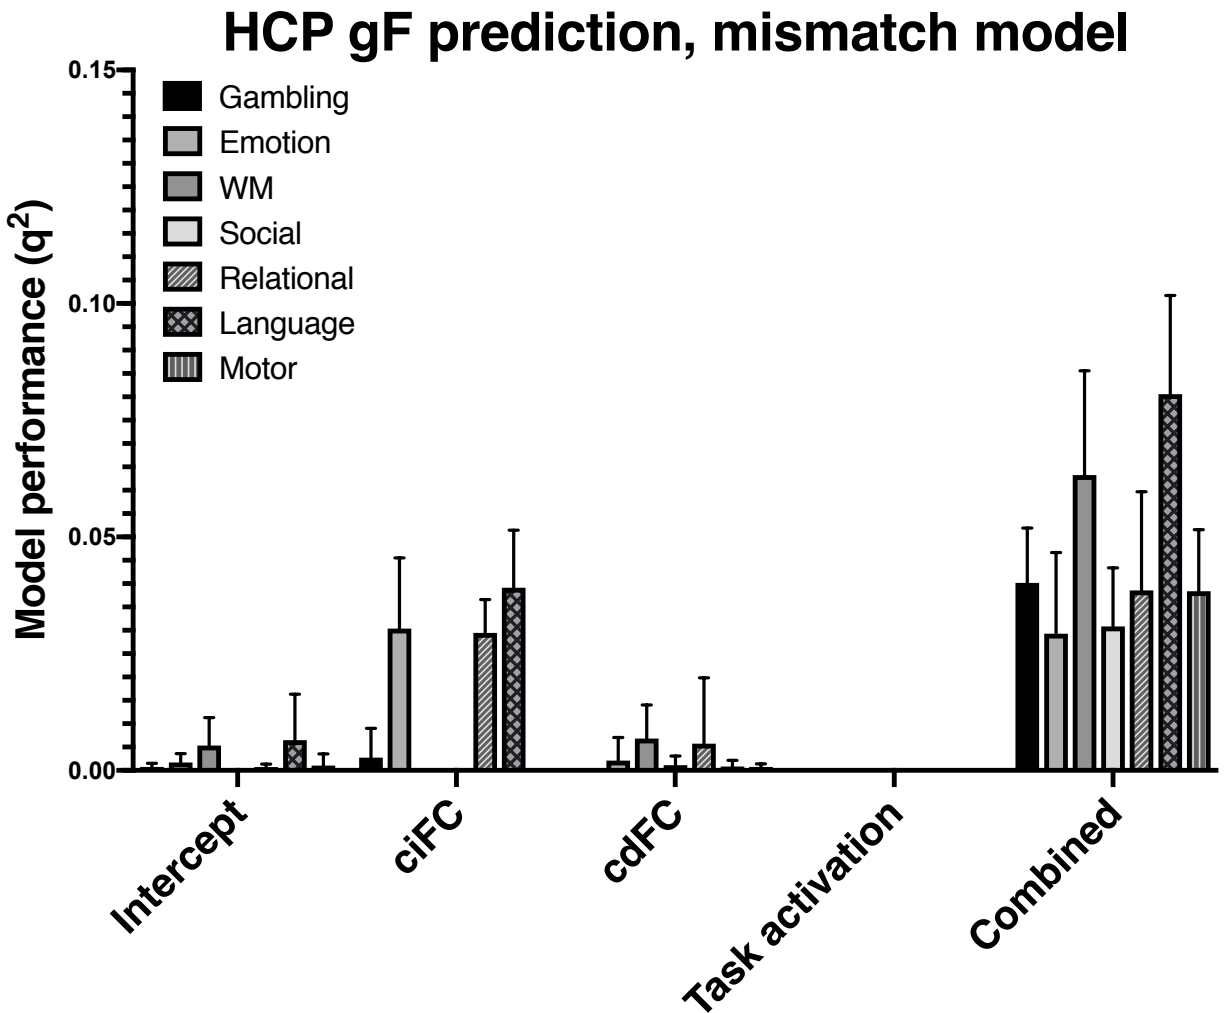

**Figure 2—figure supplement 4.** Combined and ciFC-based models, but not cdFC- or task activation-based models, successfully predict gF, even when incorrect task regressors are used. One iteration of 10-fold rCPM; 6 task/regressor combinations per task; models with  $q^2 < 0$  were set to 0. Error bars indicated s.d. of prediction performance.

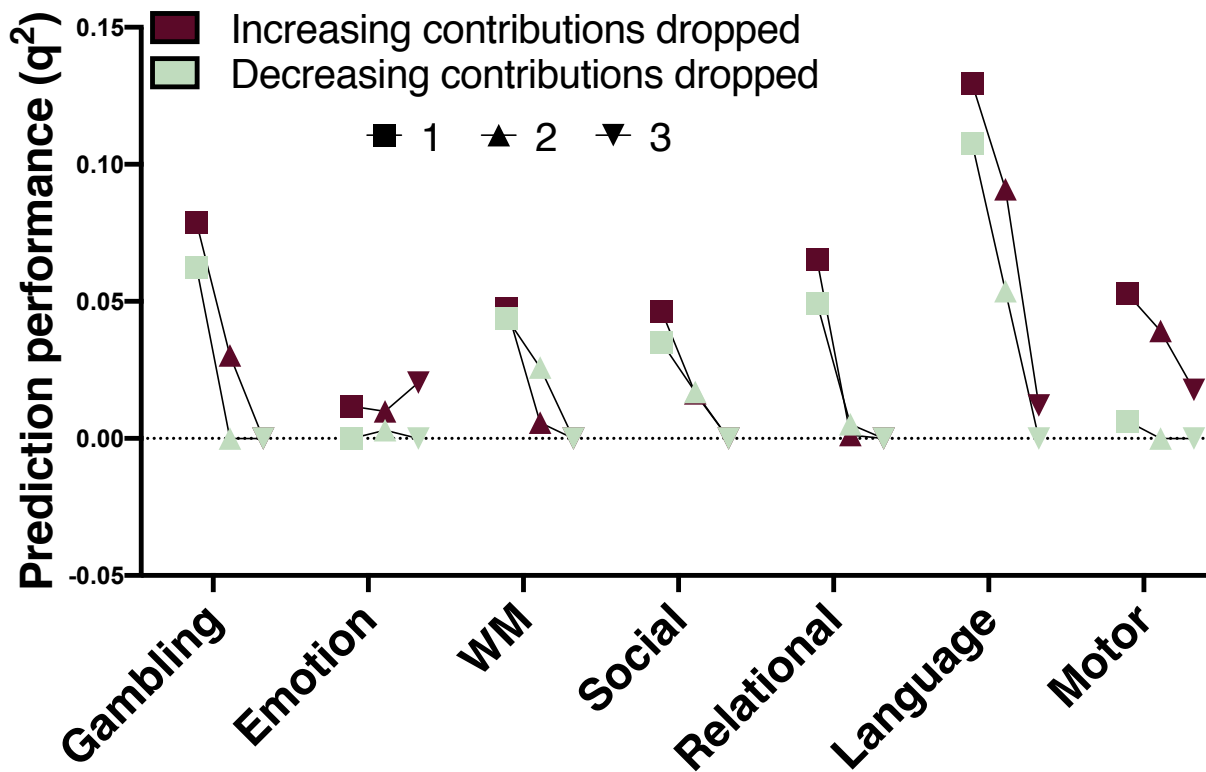

**Figure 2—figure supplement 5.** Combined model prediction performance with increasing numbers of individual terms dropped from the model in order of increasing (red) and decreasing (green) contributions. Numbers indicate number of dropped terms.

---

|                   | <b>Motion/observed gF correlation</b> |
|-------------------|---------------------------------------|
| <b>Emotion</b>    | -0.14*                                |
| <b>Gambling</b>   | -0.06                                 |
| <b>Language</b>   | -0.09                                 |
| <b>Motor</b>      | -0.10                                 |
| <b>Relational</b> | -0.15*                                |
| <b>Social</b>     | -0.12*                                |
| <b>WM</b>         | -0.08                                 |

---

**Figure 2—figure supplement 6.** Pearson correlation between mean RMS motion (averaged between LR and RL runs for each subject) and observed gF. \*indicates significant at  $P < 0.05$ , Bonferroni corrected.

|                   | <b>Intercept</b>   | <b>ciFC</b> | <b>cdFC</b> | <b>Activation</b> | <b>Combined</b>    |
|-------------------|--------------------|-------------|-------------|-------------------|--------------------|
| <b>Emotion</b>    | 0                  | -0.14**     | -0.02       | 0.11              | -0.11              |
| <b>Gambling</b>   | 0.04 <sup>+</sup>  | 0.08        | 0           | 0.09              | -0.03 <sup>+</sup> |
| <b>Language</b>   | -0.16**            | -0.09       | -0.15**     | 0.05              | -0.17**            |
| <b>Motor</b>      | -0.02              | -0.20**     | 0.04        | 0.11              | -0.13**            |
| <b>Relational</b> | 0.08               | -0.05       | 0           | 0.08              | -0.09 <sup>+</sup> |
| <b>Social</b>     | -0.02 <sup>+</sup> | 0.09        | -0.01       | 0.09              | -0.05 <sup>+</sup> |
| <b>WM</b>         | -0.06 <sup>+</sup> | 0           | -0.03       | -0.01             | -0.09 <sup>+</sup> |

**Figure 2—figure supplement 7.** Pearson correlation between mean RMS motion (averaged between LR and RL runs for each subject) and predicted gF (averaged across 100 iterations; see main text) for all tasks and terms. \*indicates significant at  $P < 0.05$ , Bonferroni corrected; <sup>+</sup>indicates significant corresponding predictive model (see Fig. 2).



|                   |                             | <b>Intercept</b> | <b>ciFC</b> | <b>cdFC</b> | <b>Activation</b> | <b>Combined</b> |
|-------------------|-----------------------------|------------------|-------------|-------------|-------------------|-----------------|
| <b>Emotion</b>    | <i>Parcorr (10/1)</i>       | 0.0076           | 0.0322      | -0.0327     | -0.0023           | 0.0255          |
|                   | <i>Residualized (10/1)</i>  | 0.0061           | 0.0238      | -0.0373     | -1.02E-9          | 0.0211          |
|                   | <i>Original (10/100)</i>    | 0.0042           | 0.0262      | -0.0362     | -0.005            | 0.0187          |
|                   | <i>Residualized (2/100)</i> | 0.0034           | 0.0176      | -0.0301     | 1.78E-17          | -0.0035         |
| <b>Gambling</b>   | <i>Parcorr (10/1)</i>       | 0.046            | -0.0029     | -0.015      | -0.0029           | 0.0801          |
|                   | <i>Residualized (10/1)</i>  | 0.0523           | 7.77E-4     | -0.0104     | -1.14E-9          | 0.0833          |
|                   | <i>Original (10/100)</i>    | 0.0479           | -0.0043     | -0.0182     | -0.0044           | 0.0783          |
|                   | <i>Residualized (2/100)</i> | 0.0302           | 0.0051      | -0.0182     | -3.44E-17         | 0.0499          |
| <b>Language</b>   | <i>Parcorr (10/1)</i>       | 0.0482           | 0.0088      | 0.0511      | -0.0057           | 0.121           |
|                   | <i>Residualized (10/1)</i>  | 0.0406           | 0.0079      | 0.0520      | -2.39E-8          | 0.1198          |
|                   | <i>Original (10/100)</i>    | 0.0467           | 0.0079      | 0.0559      | -0.0044           | 0.1227          |
|                   | <i>Residualized (2/100)</i> | 0.0268           | 0.0231      | 0.0324      | 5.56E-07          | 0.0875          |
| <b>Motor</b>      | <i>Parcorr (10/1)</i>       | -0.0027          | 0.0337      | 0.0087      | -3.72E-04         | 0.051           |
|                   | <i>Residualized (10/1)</i>  | 0.0024           | 0.0292      | 0.0060      | -1.99E-7          | 0.0488          |
|                   | <i>Original (10/100)</i>    | -0.0025          | 0.0269      | 0.0041      | -0.0046           | 0.0555          |
|                   | <i>Residualized (2/100)</i> | 7.94E-04         | 0.0217      | 5.59E-04    | 3.22E-17          | 0.0327          |
| <b>Relational</b> | <i>Parcorr (10/1)</i>       | -0.0039          | -0.0039     | -0.0142     | -0.0039           | 0.0623          |
|                   | <i>Residualized (10/1)</i>  | -1.71E-8         | 0.0071      | -0.0057     | -1.71E-8          | 0.0622          |
|                   | <i>Original (10/100)</i>    | -0.0043          | 0.0026      | -0.0138     | -0.0042           | 0.0664          |
|                   | <i>Residualized (2/100)</i> | 0.0014           | 0.015       | -0.0165     | 7.17E-06          | 0.0399          |
| <b>Social</b>     | <i>Parcorr (10/1)</i>       | 0.0326           | -0.0018     | 0.0207      | -0.0018           | 0.0621          |
|                   | <i>Residualized (10/1)</i>  | 0.0309           | -1.13E-5    | 0.0312      | -8.12E-9          | 0.0596          |
|                   | <i>Original (10/100)</i>    | 0.03             | -0.0045     | 0.0162      | -0.0046           | 0.0532          |
|                   | <i>Residualized (2/100)</i> | 0.0153           | 0.0035      | 0.0129      | -5.55E-18         | 0.0449          |
| <b>WM</b>         | <i>Parcorr (10/1)</i>       | 0.0207           | -0.003      | 0.0171      | -0.0025           | 0.0526          |
|                   | <i>Residualized (10/1)</i>  | 0.0216           | 4.38E-5     | 0.0011      | -3.52E-7          | 0.0461          |
|                   | <i>Original (10/100)</i>    | 0.0179           | -0.004      | 0.0019      | -0.0032           | 0.0454          |
|                   | <i>Residualized (2/100)</i> | 0.0186           | 0.0026      | 0.0179      | 6.77E-05          | 0.0536          |

**Figure 2—figure supplement 8.** Comparison of main results (“Original”) to performance of predictive models built using partial correlation-based feature selection (“Parcorr,” i.e., controlling for motion), and regression of motion values out of FC and gF (“Residualized”). In all cases,  $P$  threshold = 0.1. Numbers in parentheses indicate number of folds and iterations (e.g., “Parcorr (10/1)” indicates partial correlation-based feature selection with 10 folds and 1 iteration). For cases in which a single iteration of prediction was performed, results presented as  $q^2$ ; for cases in which more than one iteration of prediction was performed, results presented as mean  $q^2$ .

|                   | <b>Intercept</b> | <b>ciFC</b> | <b>cdFC</b> | <b>Activation</b> | <b>Combined</b> |
|-------------------|------------------|-------------|-------------|-------------------|-----------------|
| <b>Emotion</b>    | NaN              | 0.9074      | 0.8881      | NaN               | 0.9095          |
| <b>Gambling</b>   | 0.9739           | NaN         | 0.9300      | NaN               | 0.9636          |
| <b>Language</b>   | 0.9527           | NaN         | 0.9368      | NaN               | 0.9527          |
| <b>Motor</b>      | 0.8852           | 0.9321      | 0.9265      | NaN               | 0.9329          |
| <b>Relational</b> | NaN              | NaN         | 0.8916      | NaN               | 0.9139          |
| <b>Social</b>     | 0.9347           | NaN         | 0.9267      | NaN               | 0.9465          |
| <b>WM</b>         | 0.8619           | NaN         | NaN         | NaN               | 0.9779          |

**Figure 2—figure supplement 9.** Pearson correlation between consistently selected features' rCPM betas for the main models and the partial correlation-based models. NaN indicates that no features were selected on 75% or more feature selections for one or both model(s).

|                   | <b>Task timing/motion, LR<br/>correlation</b> | <b>Task timing/motion, RL<br/>correlation</b> |
|-------------------|-----------------------------------------------|-----------------------------------------------|
| <b>Emotion</b>    | -0.0002                                       | 0.0030                                        |
| <b>Gambling</b>   | -0.0167                                       | -0.0220                                       |
| <b>Language</b>   | -0.0132                                       | -0.0124                                       |
| <b>Motor</b>      | 0.0141                                        | 0.0065                                        |
| <b>Relational</b> | 0.0011                                        | -0.0048                                       |
| <b>Social</b>     | -0.0292                                       | -0.0344                                       |
| <b>WM</b>         | -0.0055                                       | -0.0015                                       |

**Figure 2—figure supplement 10.** Rank correlation coefficients between frame-to-frame relative RMS motion and task timing, averaged across task conditions and subjects.

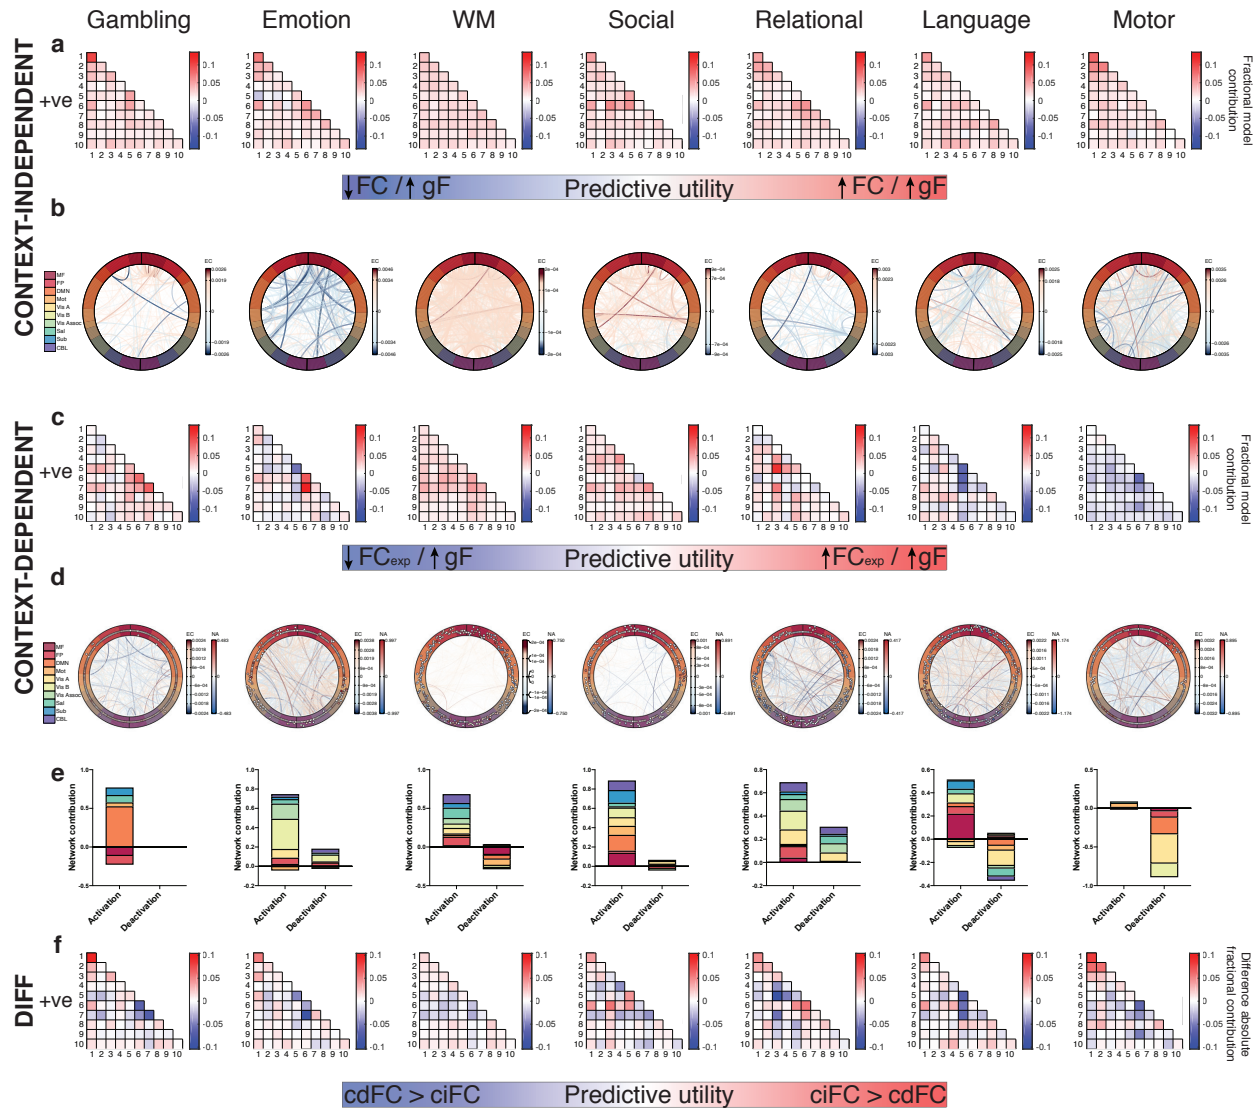

1: Medial frontal | 2: Frontoparietal | 3: DMN | 4: Motor | 5-7: Visual | 8: Salience | 9: Subcortical | 10: Cerebellum

**Figure 3—figure supplement 1. Context-independent FC, context-dependent FC, and activation predictive features are distributed and distinct.** (a) Visualization of predictive ciFC features by network for each task. Red = positive ridge coefficients, blue = negative ridge coefficients, shade = relative model contribution. In this and all subsequent figures: “+ve” indicates that results reflect only contributions of edges with mean positive ciFC. 1-10 = network assignment. (b) Visualization of individual predictive ciFC features, with each consistently selected edge represented as a line; line color and thickness scale with predictive model contribution. In this and all subsequent figures, MF = medial frontal, FP = frontoparietal, DMN = default mode network, Mot = motor, Vis A = visual A, Vis B = visual B, Vis Assoc = visual association, Sal = salience, Sub = subcortical, CBL = cerebellum. EC, edge contribution. (c) Visualization of predictive cdFC features by network for each task.  $FC_{exp}$ , FC during the experimental condition (i.e., condition of interest). Red = positive ridge coefficients, blue = negative ridge coefficients, shade = relative model contribution. 1-10 = network assignment. (d) Visualization of individual predictive cdFC (lines) and activation (outer track circles) features; line color and thickness scale with cdFC feature predictive utility, and circles represent the corresponding nodes, with their color indicating mean activation (red = positive, blue = negative)

and distance from the x axis indicating their model contribution. EC, edge contribution; NA, node activation. (e) Visualization of predictive activation features' (i.e., nodes') network assignments for nodes with mean positive PPI activation betas ("activation") and for nodes with mean negative PPI activation betas ("deactivation"). (f) Visualization of the difference between absolute, network-level ciFC model contributions (i.e., absolute value of matrices in [a]) and absolute, network-level cdFC model contributions (i.e., absolute value of matrices in [c]).

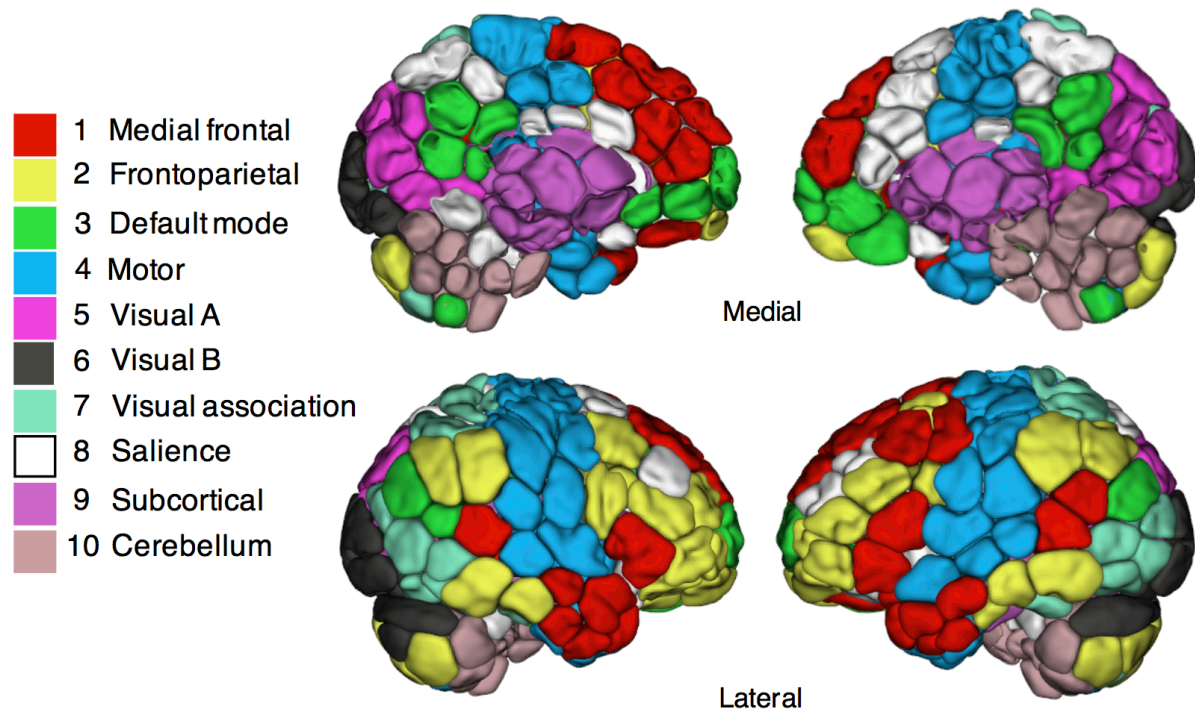

**Figure 3—figure supplement 2.** Ten canonical networks used for network analyses (see Methods for derivation). Figure adapted from Greene et al. (2018).

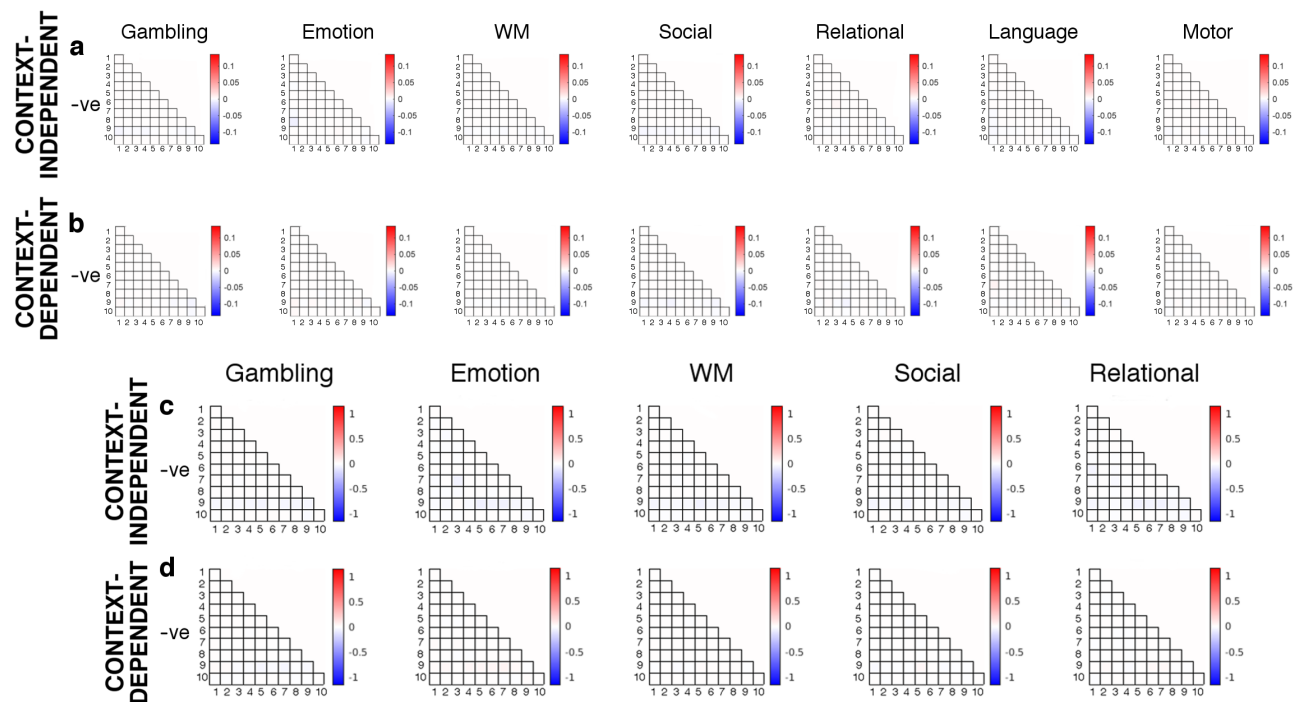

**Figure 3—figure supplement 3.** Predictive model contributions of features with mean negative ciFC (a,b) and inter-subject consistency of features with mean negative ciFC (c,d), summarized by canonical networks (Figure 3—figure supplement 2). Canonical network labels: 1 = medial frontal, 2 = frontoparietal, 3 = DMN, 4 = motor, 5-7 = visual, 8 = salience, 9 = subcortical, 10 = cerebellum.

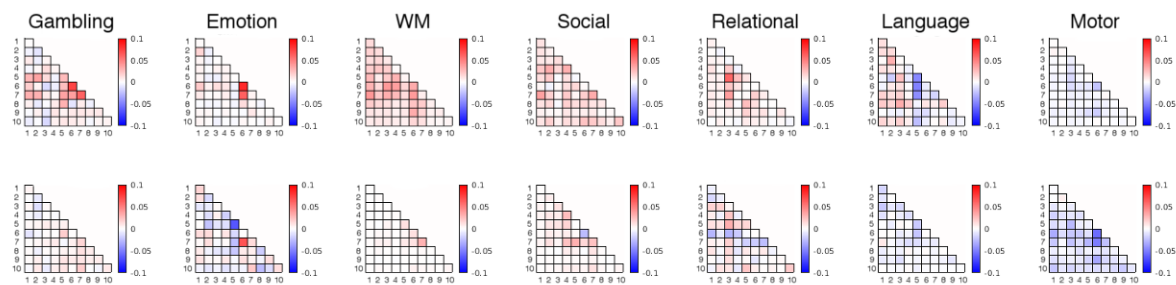

**Figure 3—figure supplement 4.** Further separating cdFC model contributions (for features with positive mean ciFC) by positive (top row) and negative (bottom row) cdFC offers additional insight into predictive task-induced changes in FC. Canonical network labels: 1 = medial frontal, 2 = frontoparietal, 3 = DMN, 4 = motor, 5-7 = visual, 8 = salience, 9 = subcortical, 10 = cerebellum.



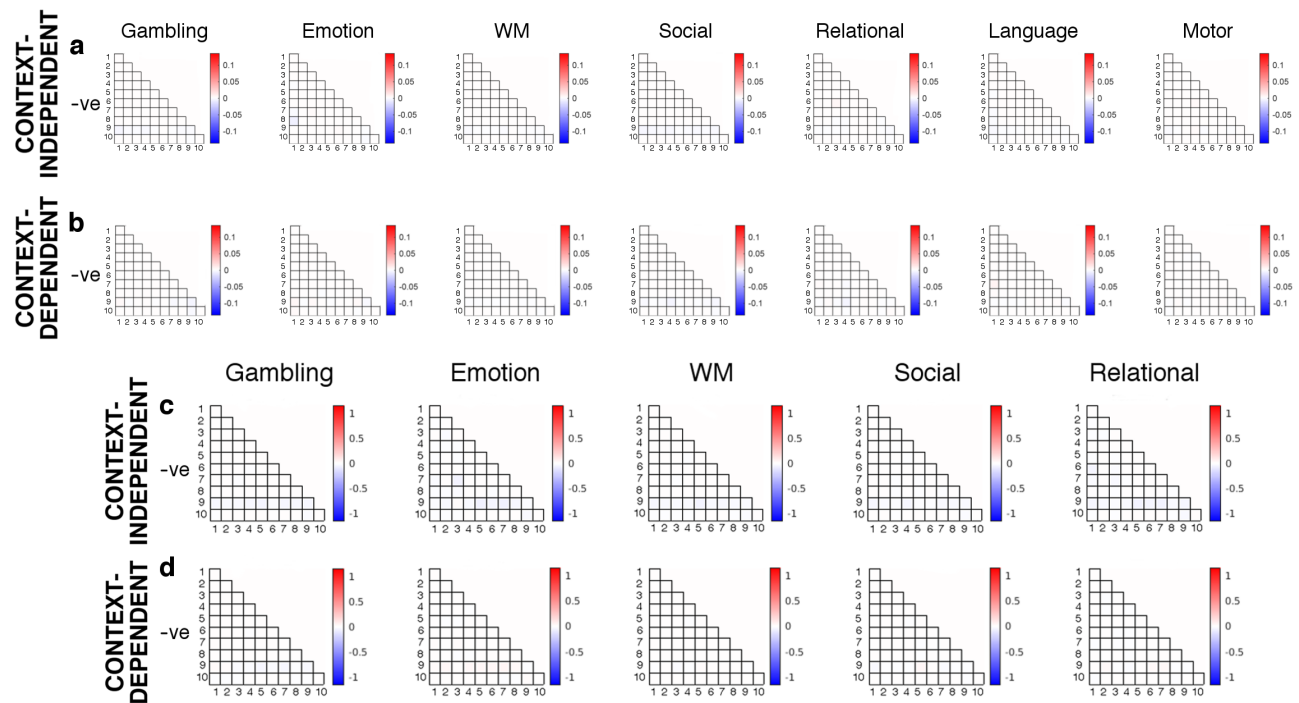

**Figure 4—figure supplement 1.** Predictive model contributions of features with mean negative ciFC (a,b) and inter-subject consistency of features with mean negative ciFC (c,d), summarized by canonical networks (Figure 3—figure supplement 2). Canonical network labels: 1 = medial frontal, 2 = frontoparietal, 3 = DMN, 4 = motor, 5-7 = visual, 8 = salience, 9 = subcortical, 10 = cerebellum. For clarity, duplicate of Figure 3—figure supplement 3.

|                   | <b>Intercept,<br/>no cdFC</b> | <b>Intercept,<br/>no ciFC</b> | <b>ciFC, no<br/>cdFC</b> | <b>Activation,<br/>no cdFC</b> | <b>Activation,<br/>no ciFC</b> | <b>cdFC, no<br/>ciFC</b> |
|-------------------|-------------------------------|-------------------------------|--------------------------|--------------------------------|--------------------------------|--------------------------|
| <b>Gambling</b>   | 0.9830                        | 0.7846                        | 0.9368                   | 0.9659                         | 0.8441                         | 0.9075                   |
| <b>Emotion</b>    | 0.9563                        | 0.9045                        | 0.9407                   | 0.9477                         | 0.8550                         | 0.9370                   |
| <b>Relational</b> | 0.9604                        | 0.8388                        | 0.9503                   | 0.9428                         | 0.8066                         | 0.9655                   |
| <b>Social</b>     | 0.9749                        | 0.7681                        | 0.9308                   | 0.9642                         | 0.8190                         | 0.8768                   |
| <b>WM</b>         | 0.9468                        | 0.8164                        | 0.9647                   | 0.9515                         | 0.8643                         | 0.9684                   |

**Figure 4—figure supplement 2.** Mean Pearson correlation coefficients between inter-subject PPI betas for full and partial models.

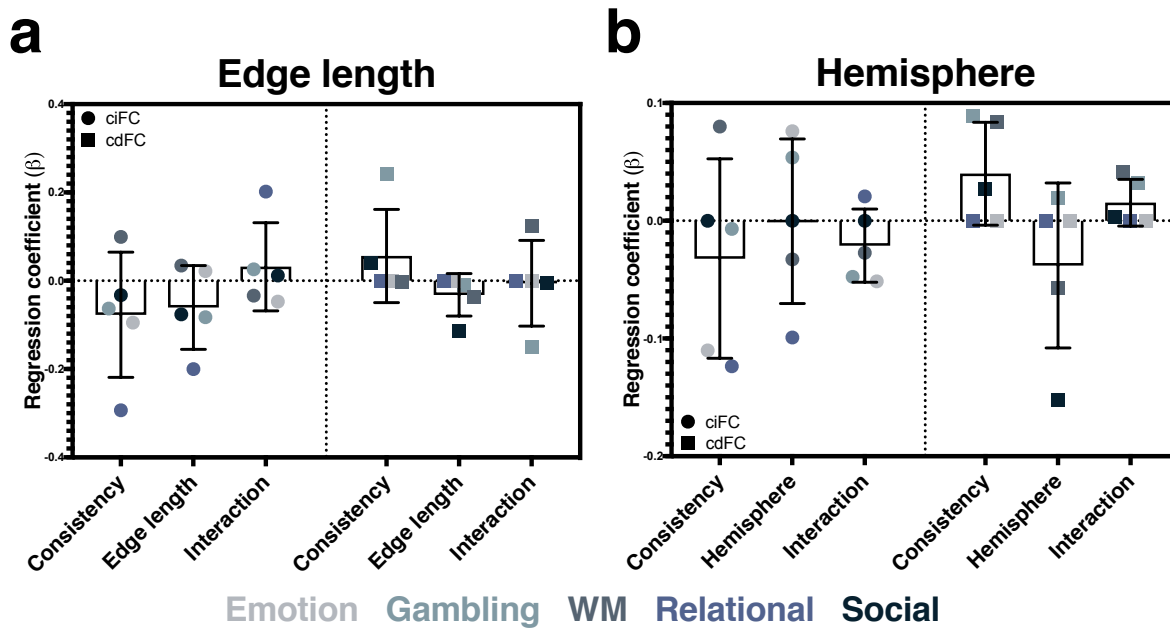

**Figure 5—figure supplement 1.** Relationships between inter-subject consistency, edge length (a), brain hemisphere (b), and predictive utility. Bar height reflects mean coefficient; error bars indicate s.d. of coefficients.
